# Supplementary material
Source: PubMed Central journal article supplement (PMC11411624)
Supplement: MD-015-D4MD00344F-s001.pdf [file MD-015-D4MD00344F-s001.pdf]

**Quinoline-based Schiff's base as possible antidiabetic agents: Ligand-based pharmacophore modeling, 3D QSAR, docking, and molecular dynamic simulations study**

Shriram D. Ranade,<sup>a</sup> Shankar G. Alegaon,<sup>\*a</sup> Nayeem A. Khatib,<sup>b</sup> Shankar Gharge,<sup>a</sup> Rohini S. Kavalapure<sup>a</sup>.

**Affiliation(s):**

<sup>a</sup>Department of Pharmaceutical Chemistry, KLE College of Pharmacy, Belagavi, KLE Academy of Higher education and Research, Belagavi - 590 010, Karnataka, India

<sup>b</sup>Department of Pharmacology, KLE College of Pharmacy, Belagavi, KLE Academy of Higher education and Research, Belagavi - 590 010, Karnataka, India

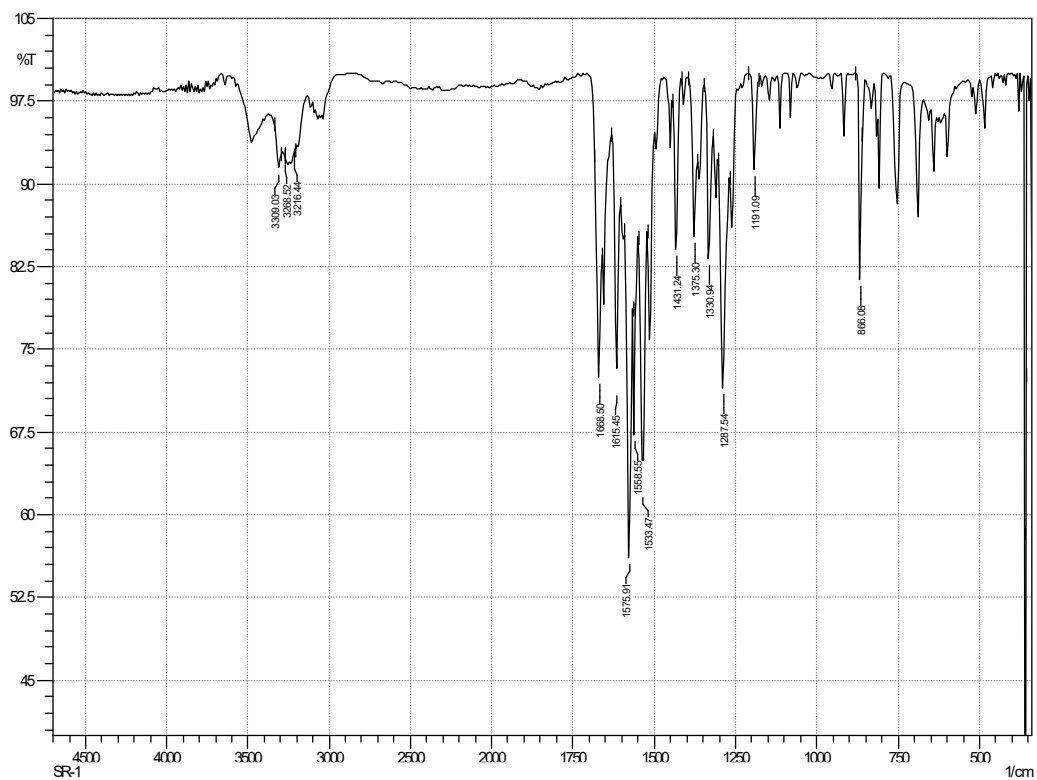

FTIR (KBr, cm<sup>-1</sup>) spectra of compound 6a

SR-1

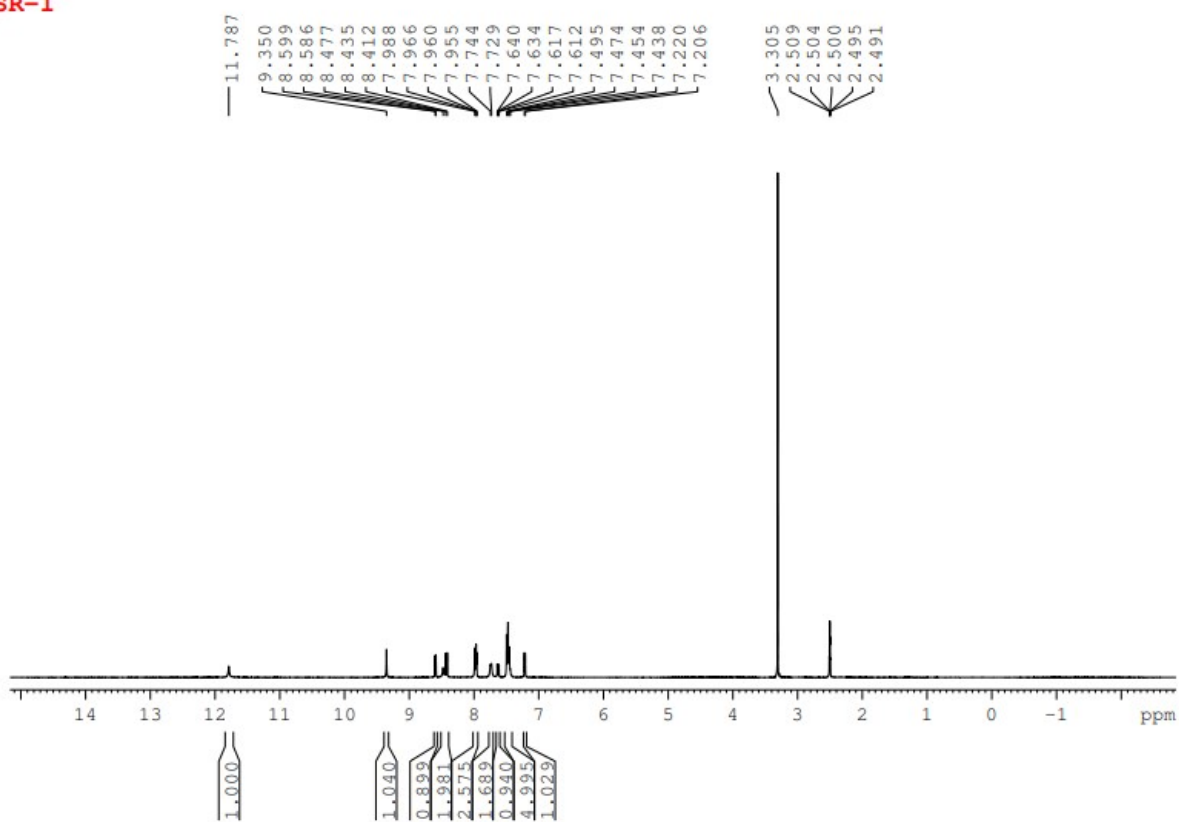

<sup>1</sup>H NMR (400 MHz, δ, ppm) spectra of compound 6a

SR-1

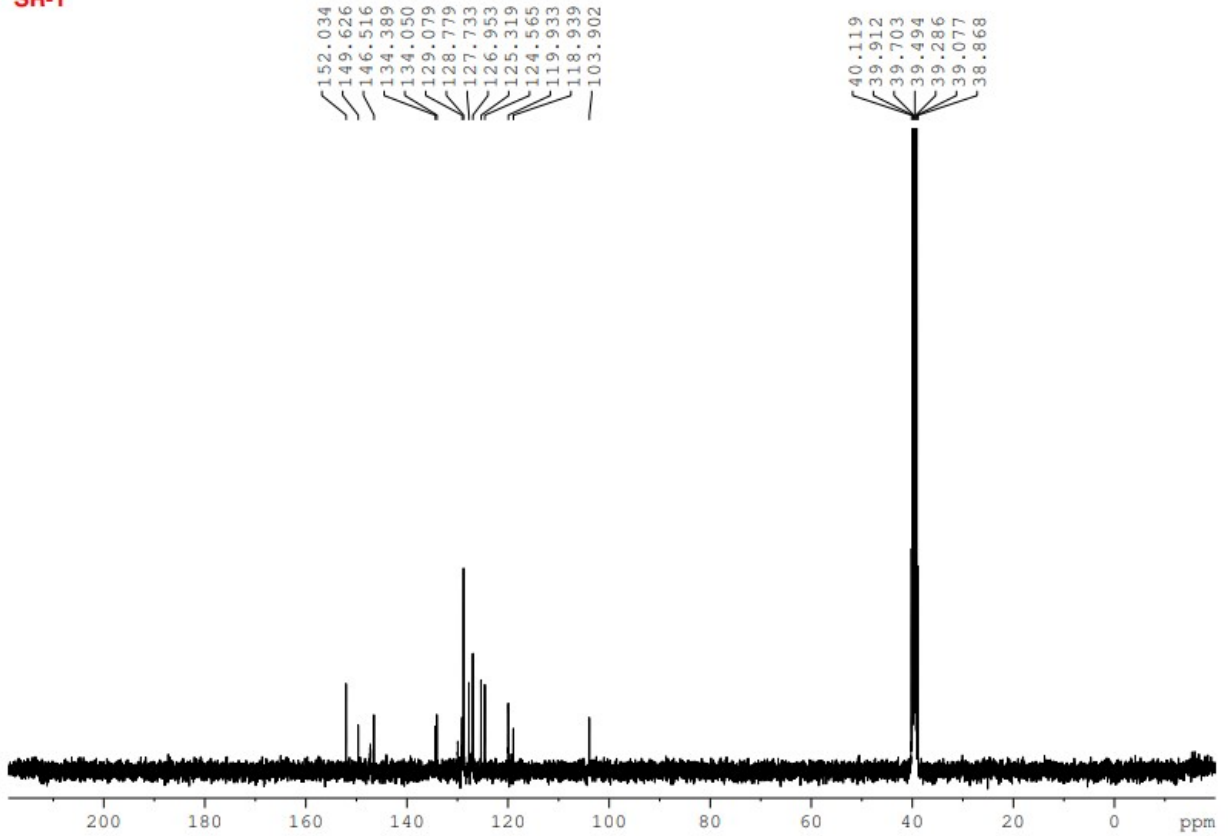

<sup>13</sup>C NMR (400 MHz, δ, ppm) spectra of compound 6a

User : Admin  
Sample : SR-1  
Inj. Volume : 5.000  
Data Name : D:\lcms-data-c\SR-1-APCI-POS1.qld  
Method Name : C:\LCMSsolution\User\Method\vesi.qlm

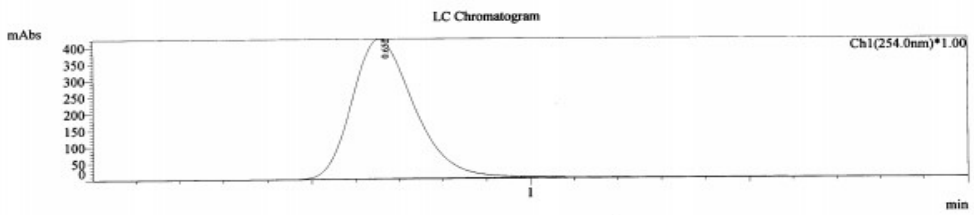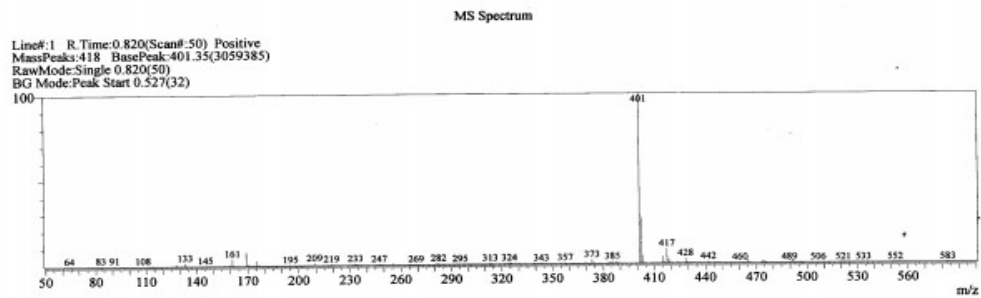

| Peak# | R.Time | I.Time | F.Time | Area     | Height  | A/H   | Mark | %Total | Name | Base m/z | Base Int. |
|-------|--------|--------|--------|----------|---------|-------|------|--------|------|----------|-----------|
| 1     | 0.820  | 0.527  | 1.093  | 80256286 | 4955872 | 16.19 |      | 100.00 |      | 401.35   | 3059385   |
|       |        |        |        | 80256286 | 4955872 |       |      | 100.00 |      |          |           |

LC-MS spectra of compound 6a

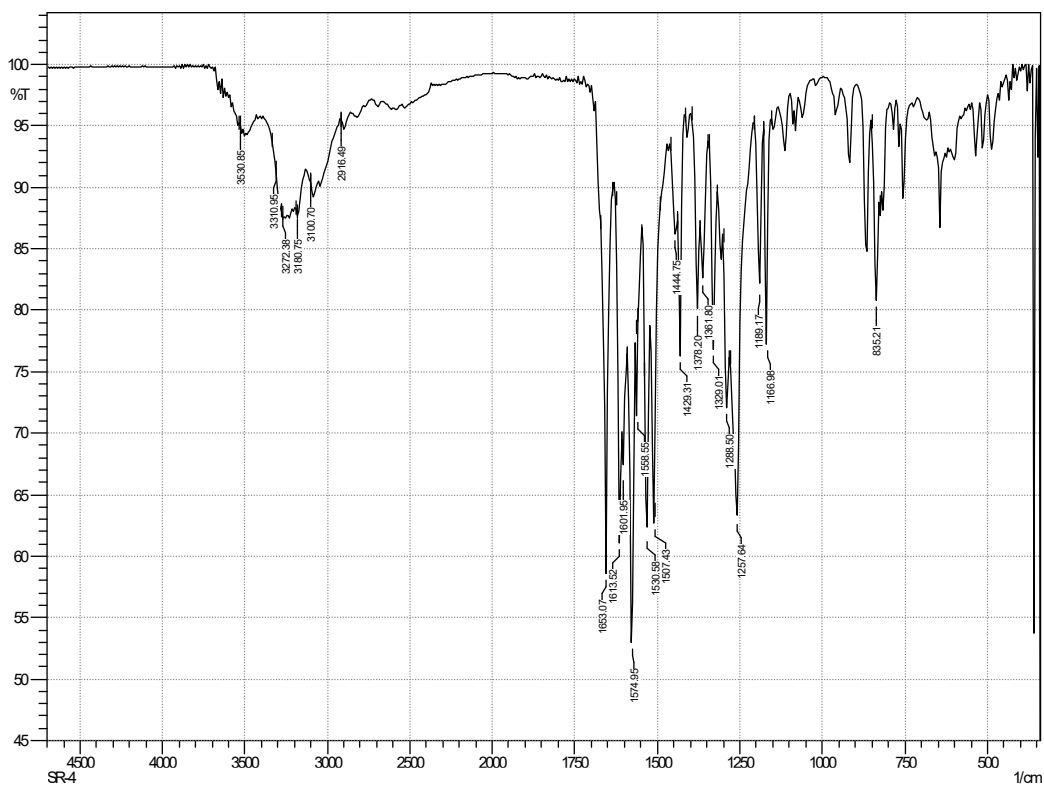

FTIR (KBr, cm<sup>-1</sup>) spectra of compound 6b

SR-4

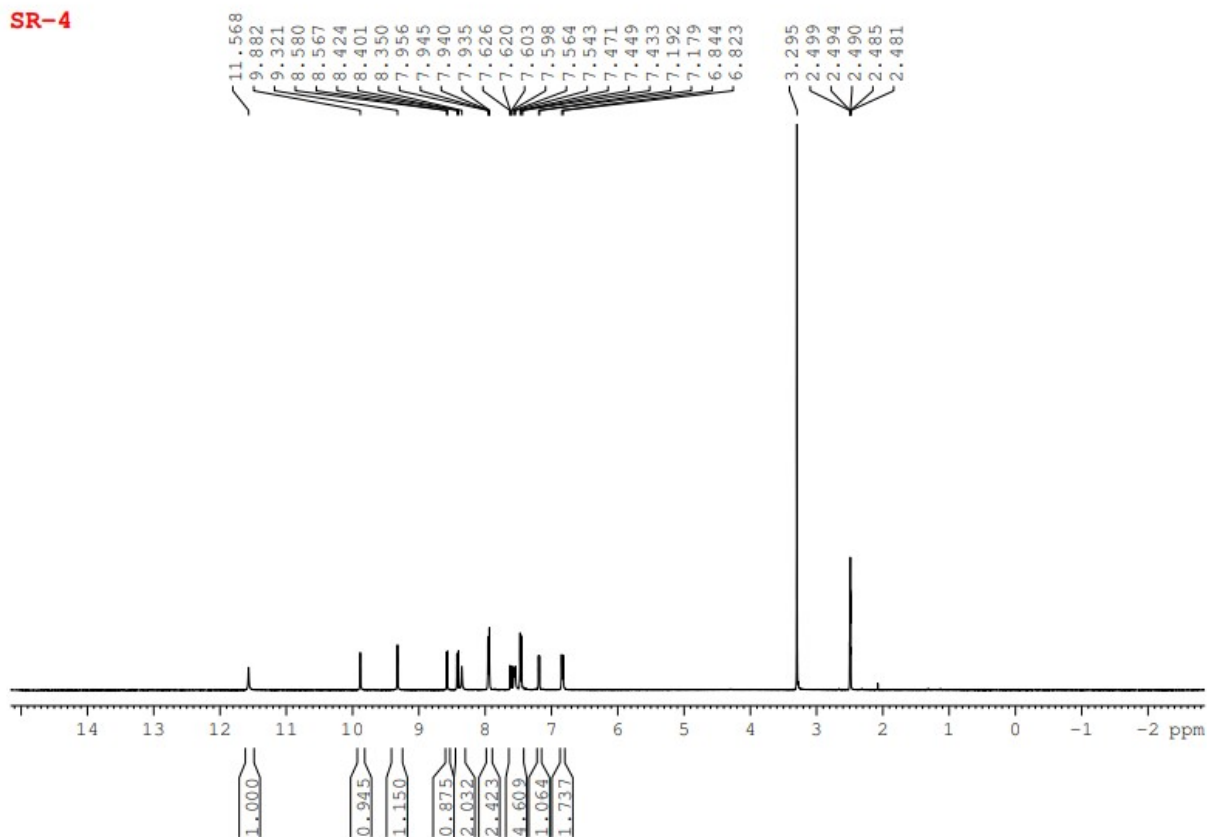

<sup>1</sup>H NMR (400 MHz, δ, ppm) spectra of compound 6b

SR-4

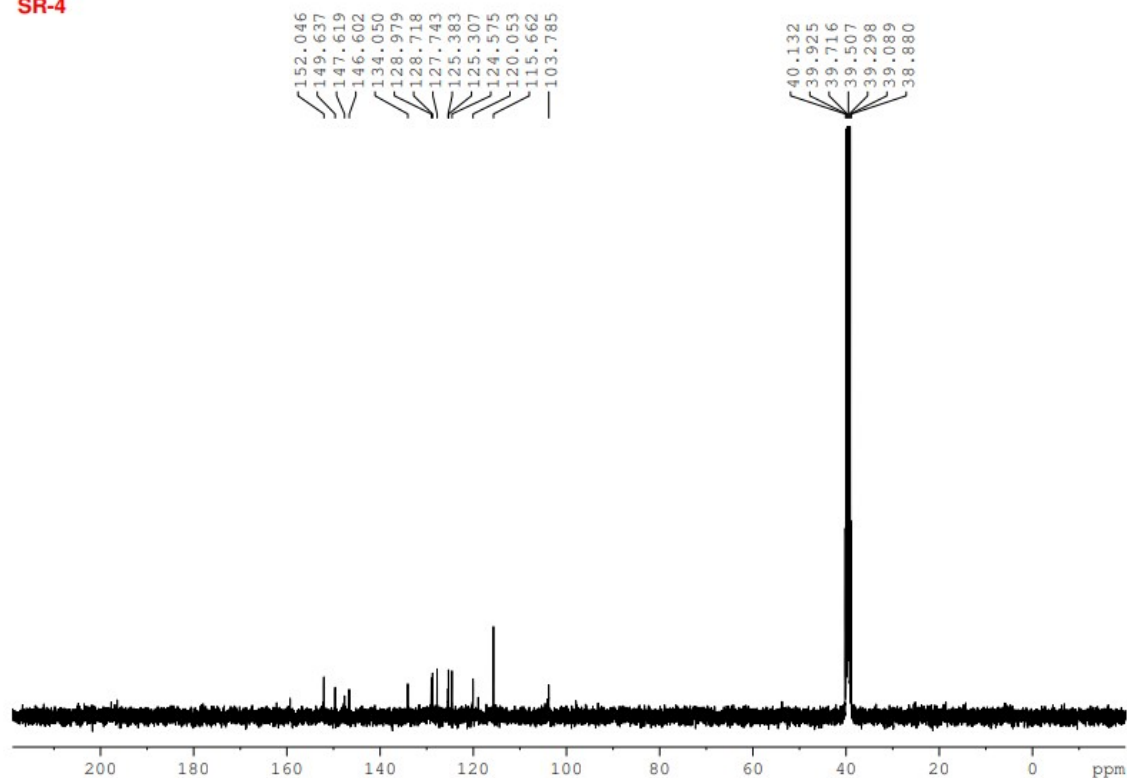

<sup>13</sup>C NMR (400 MHz, δ, ppm) spectra of compound 6b

User : Admin  
Sample : SR-8  
Inj. Volume : 5.000  
Data Name : D:\lcms-data-c\SR-8-APCI-POS1.qld  
Method Name : C:\LCMSsolution\User\Method\esi.qlm

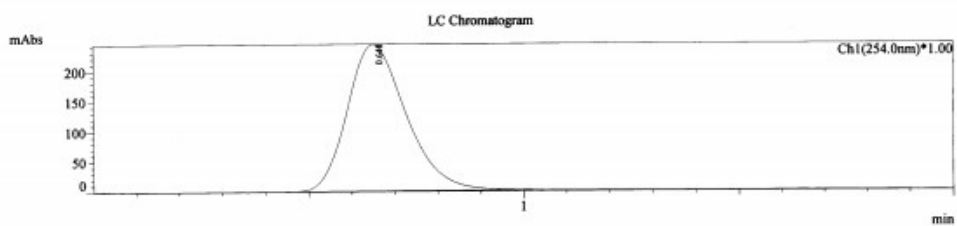

MS Spectrum

Line# 1 R.Time: 0.744(Scan#: 45) Positive  
MassPeaks: 443 BasePeak: 435.30(11504669)  
RawMode: Single 0.744(45)  
BG Mode: Peak Start 0.543(33)

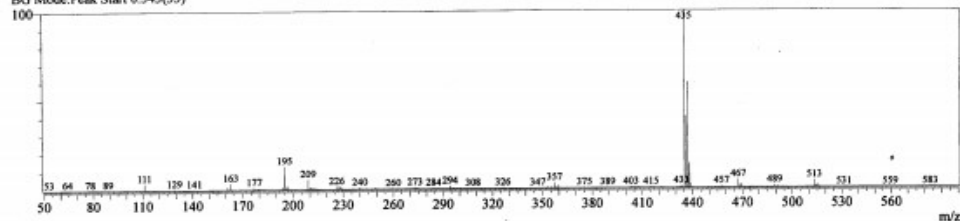

| Peak# | R.Time | I.Time | F.Time | Area      | Height   | A/H   | Mark | %Total | Name | Base m/z | Base Int. |
|-------|--------|--------|--------|-----------|----------|-------|------|--------|------|----------|-----------|
| 1     | 0.744  | 0.543  | 1.043  | 361513168 | 22896170 | 15.78 |      | 100.00 |      | 435.30   | 11504669  |
|       |        |        |        | 361513168 | 22896170 |       |      | 100.00 |      |          |           |

LC-MS spectra of compound 6b

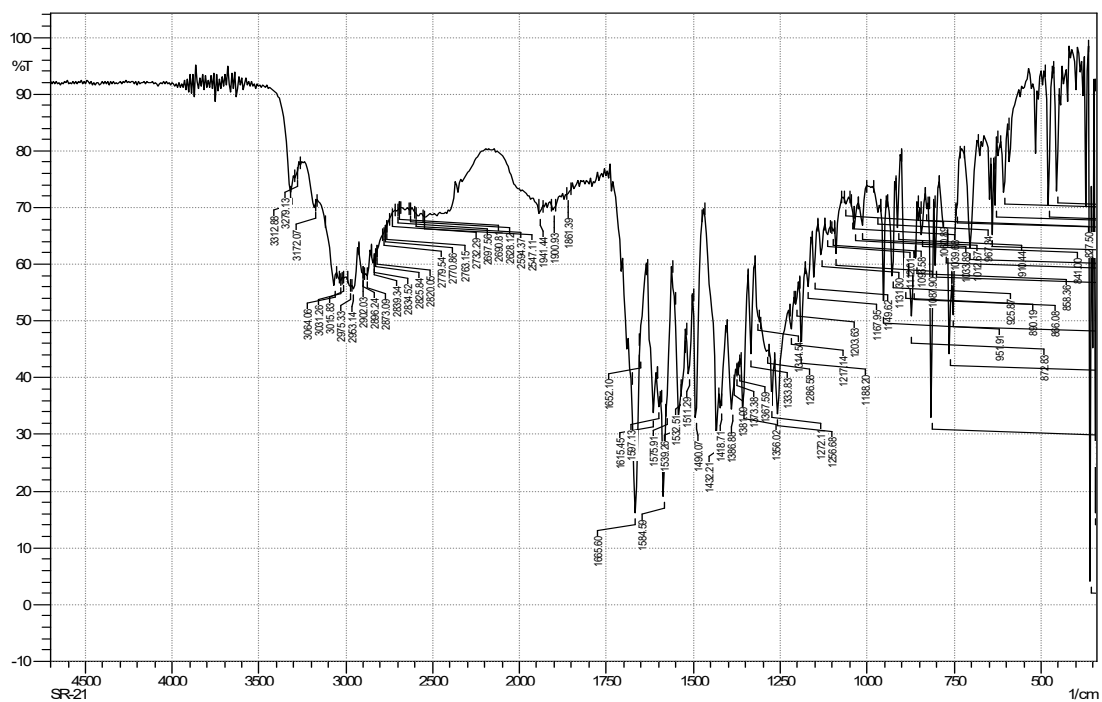

FTIR (KBr,  $\text{cm}^{-1}$ ) spectra of compound 6c

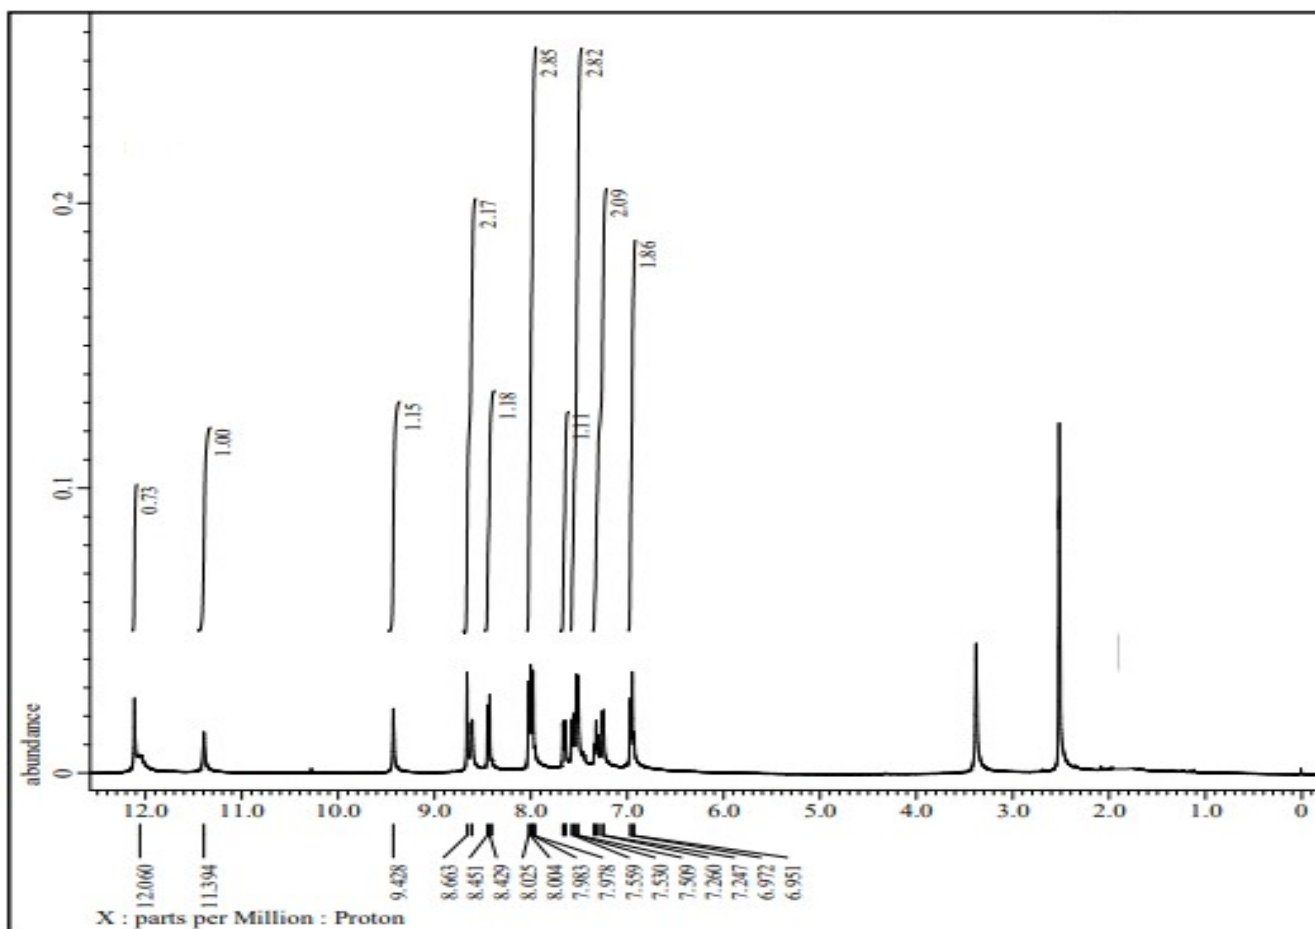

$^1\text{H}$  NMR (400 MHz,  $\delta$ , ppm) spectra of compound 6c

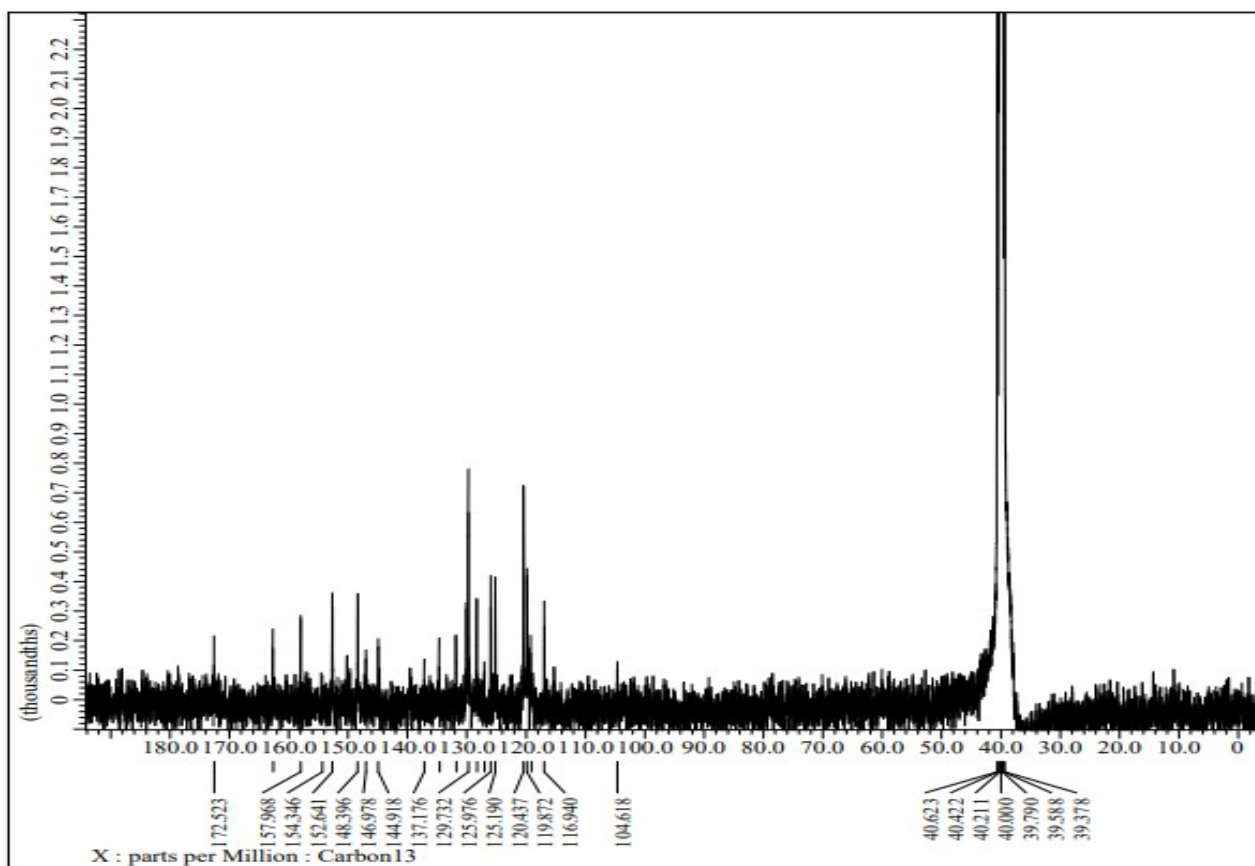

<sup>13</sup>C NMR (400 MHz, δ, ppm) spectra of compound 6c

User : Admin  
 Sample : SR-21  
 Inj. Volume : 5.000  
 Data Name : D:\lcms-data-c\SR-21-APCI-POS1.qld  
 Method Name : C:\LCMSsolution\User\Method\vesi.qlm

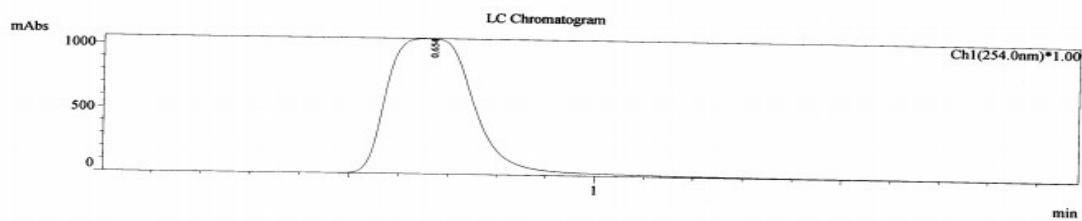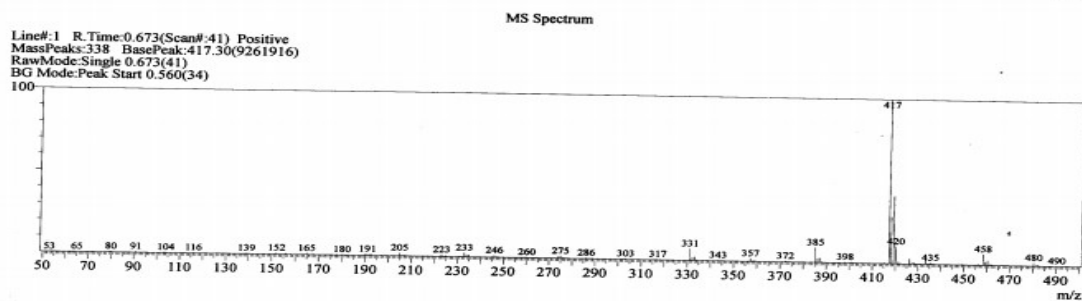

| Peak# | R.Time | I.Time | F.Time | Area      | Height   | A/H   | Mark | %Total | Name | Base m/z | Base Int. |
|-------|--------|--------|--------|-----------|----------|-------|------|--------|------|----------|-----------|
| 1     | 0.673  | 0.560  | 1.043  | 147710890 | 13955548 | 10.58 |      | 100.00 |      | 417.30   | 9261916   |

LC-MS spectra of compound 6c

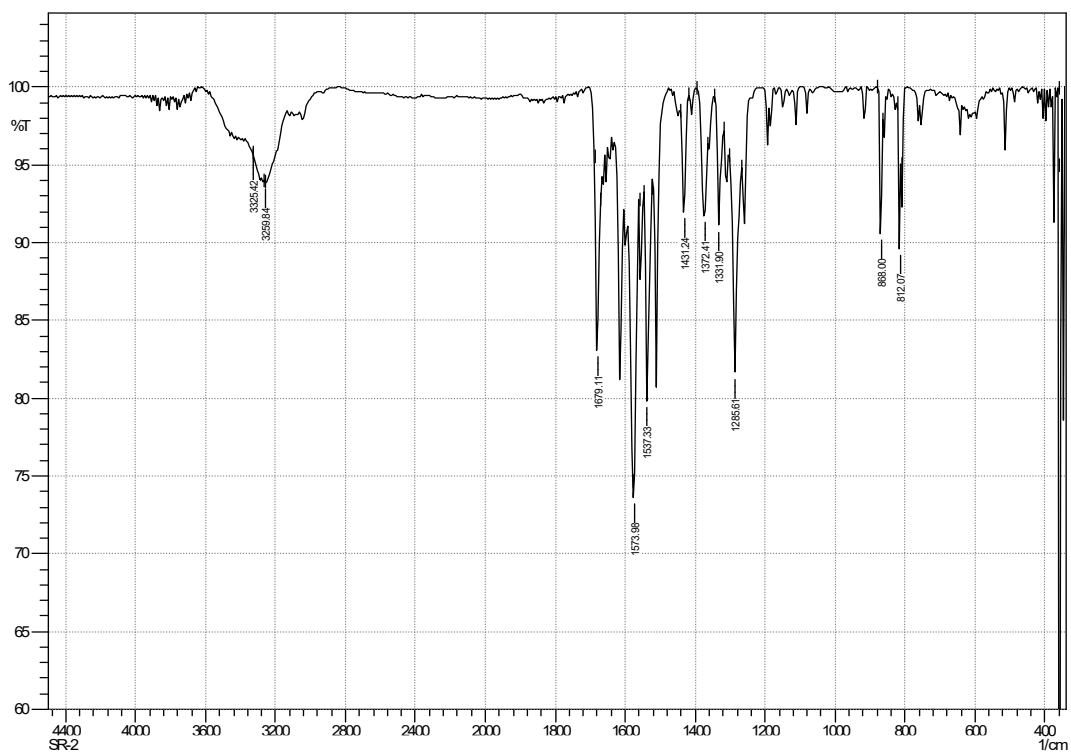

FTIR (KBr, cm<sup>-1</sup>) spectra of compound 6d

SR-2

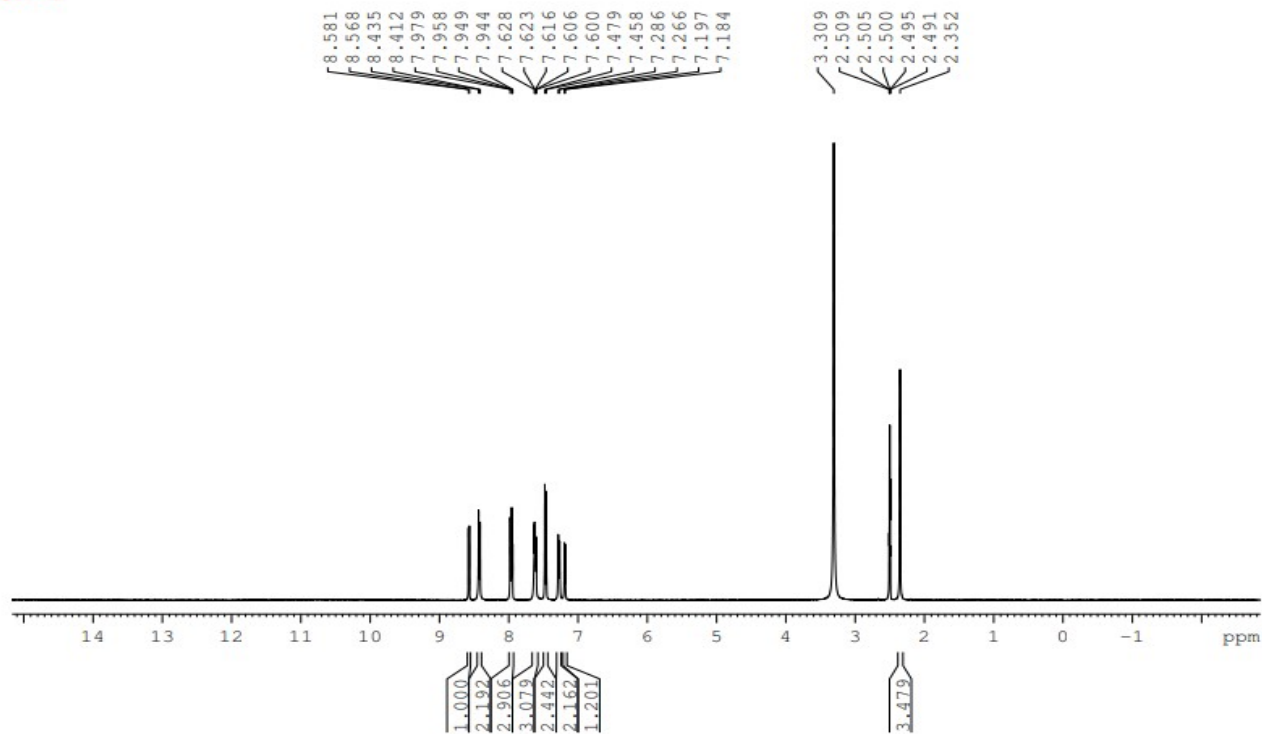

<sup>1</sup>H NMR (400 MHz, δ, ppm) spectra of compound 6d



SR-2

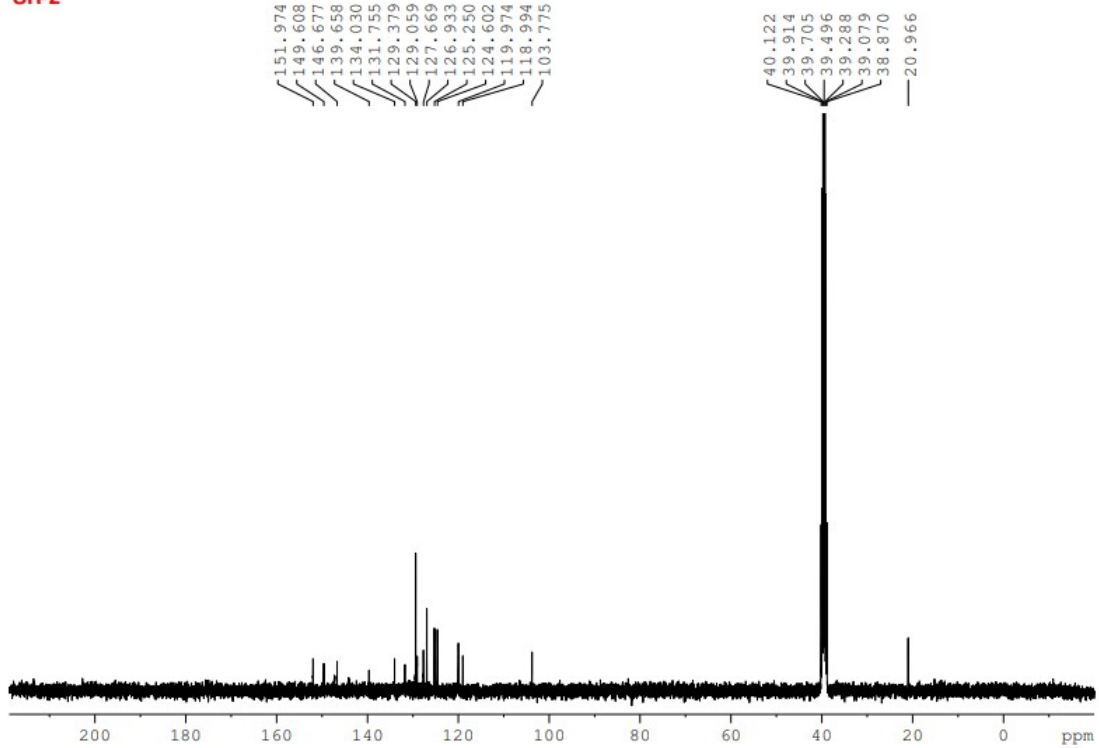

### <sup>13</sup>C NMR (400 MHz, δ, ppm) spectra of compound 6d

User : Admin  
Sample : SR-2  
Inj. Volume : 5.000  
Data Name : D:\lcms-data-c\SR-2-APCI-POS1.qld  
Method Name : C:\LCMSsolution\User\Method\esi.qlm

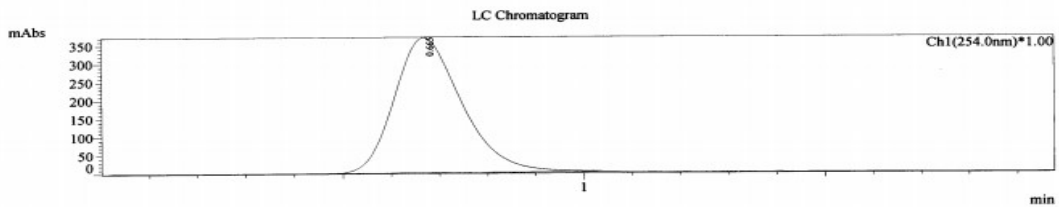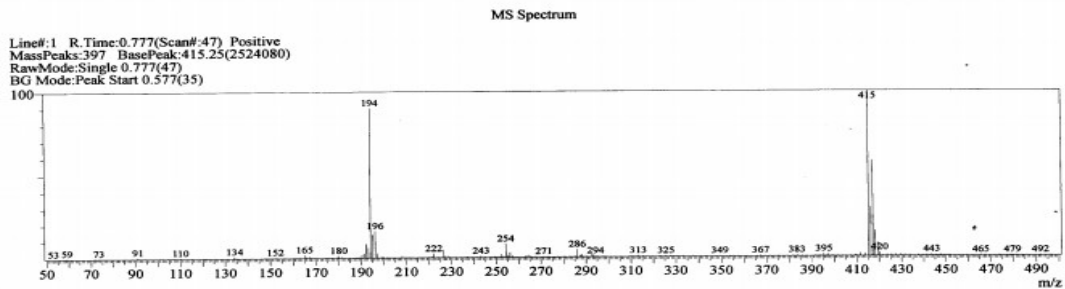

| Peak# | R.Time | LTime | F.Time | Area      | Height   | A/H   | Mark | %Total | Name | Base m/z | Base Int. |
|-------|--------|-------|--------|-----------|----------|-------|------|--------|------|----------|-----------|
| 1     | 0.777  | 0.577 | 1.043  | 145448674 | 12323758 | 11.80 |      | 100.00 |      | 415.25   | 2524080   |

### LC-MS spectra of compound 6d

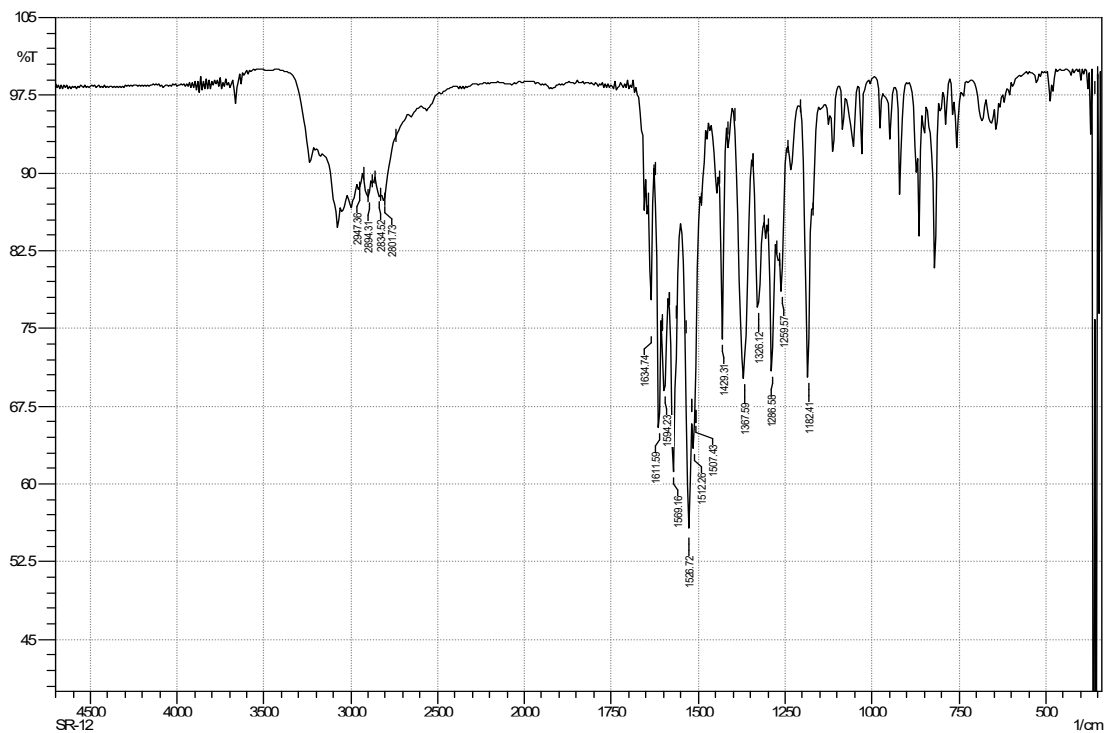

FTIR (KBr,  $\text{cm}^{-1}$ ) spectra of compound 6e

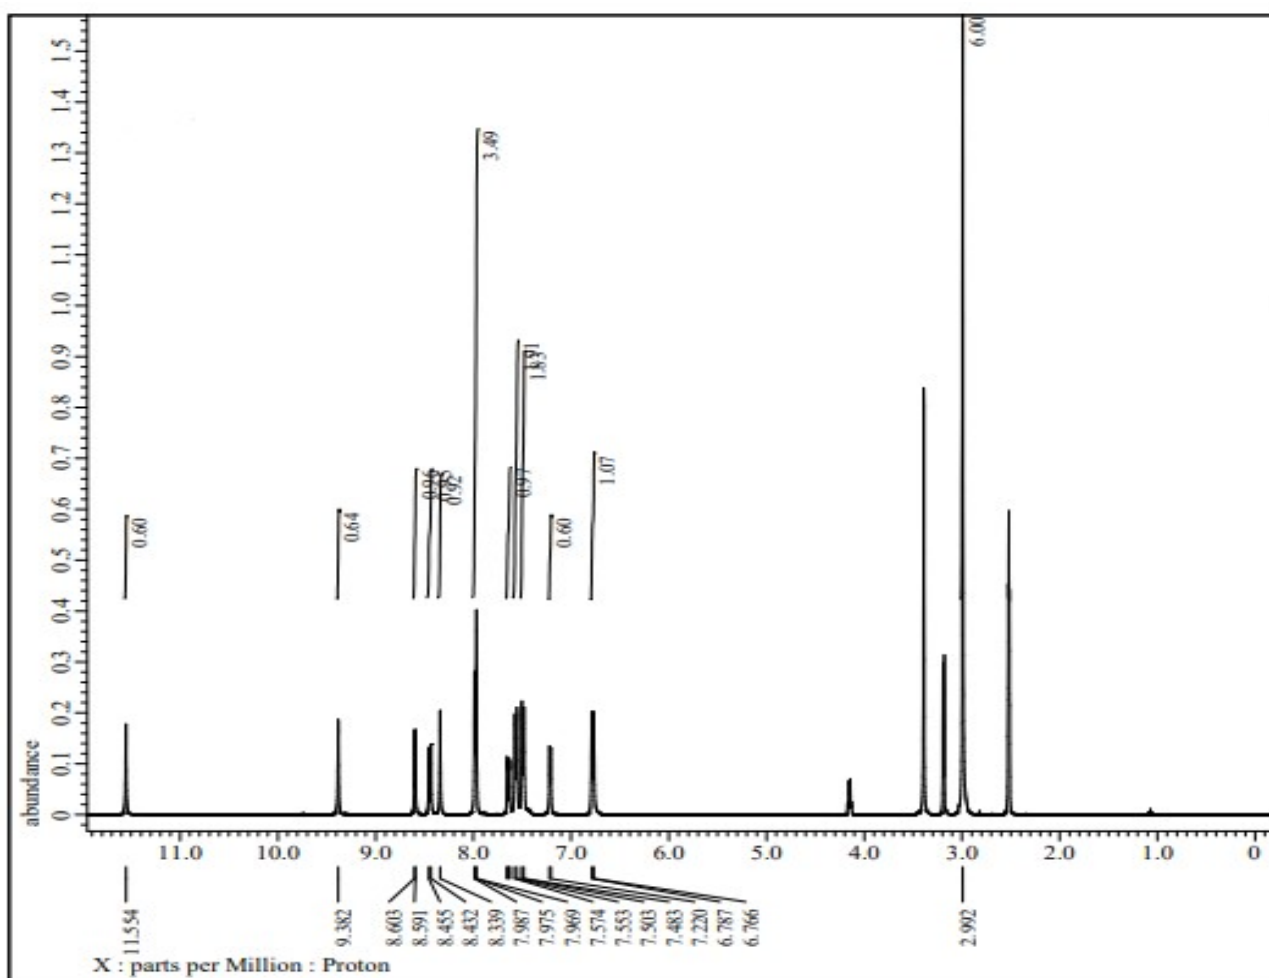

$^1\text{H}$  NMR (400 MHz,  $\delta$ , ppm) spectra of compound 6e

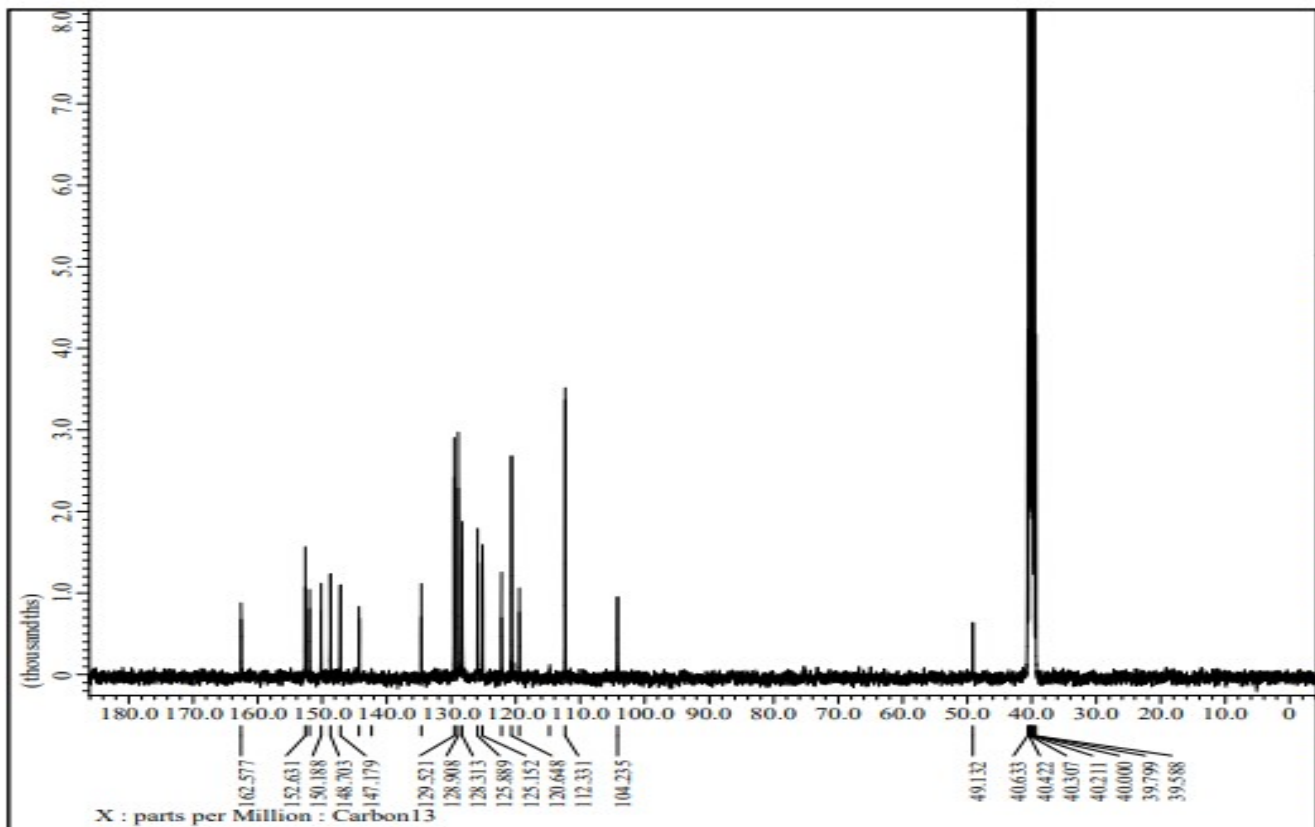

$^{13}\text{C}$  NMR (400 MHz,  $\delta$ , ppm) spectra of compound 6e

User : Admin  
 Sample : SR-12  
 Inj. Volume : 5.000  
 Data Name : D:\lcms-data-c\SR-12-APCI-POS1.qld  
 Method Name : C:\LCMSsolution\User\Method\esi.qlm

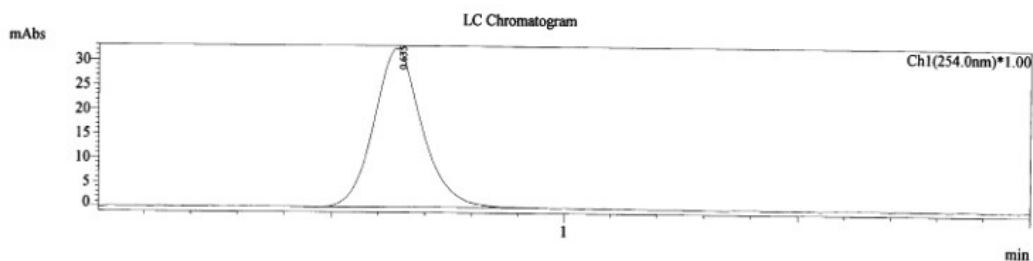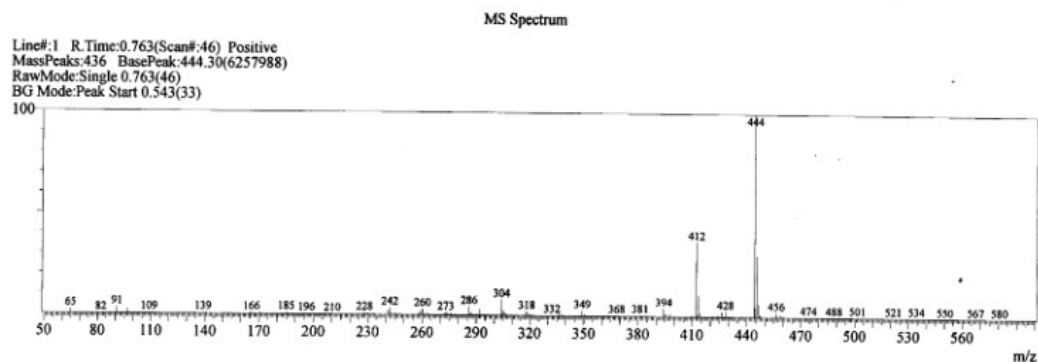

LC-MS spectra of compound 6e

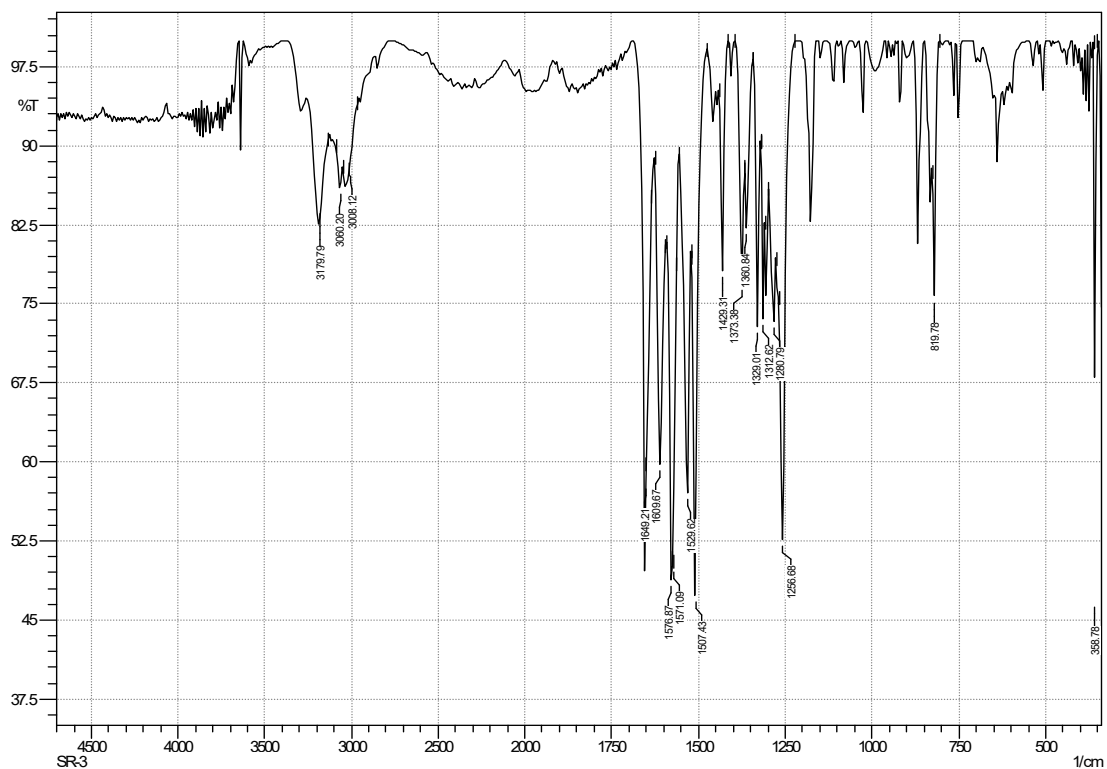

FTIR (KBr,  $\text{cm}^{-1}$ ) spectra of compound 6f

SR-3

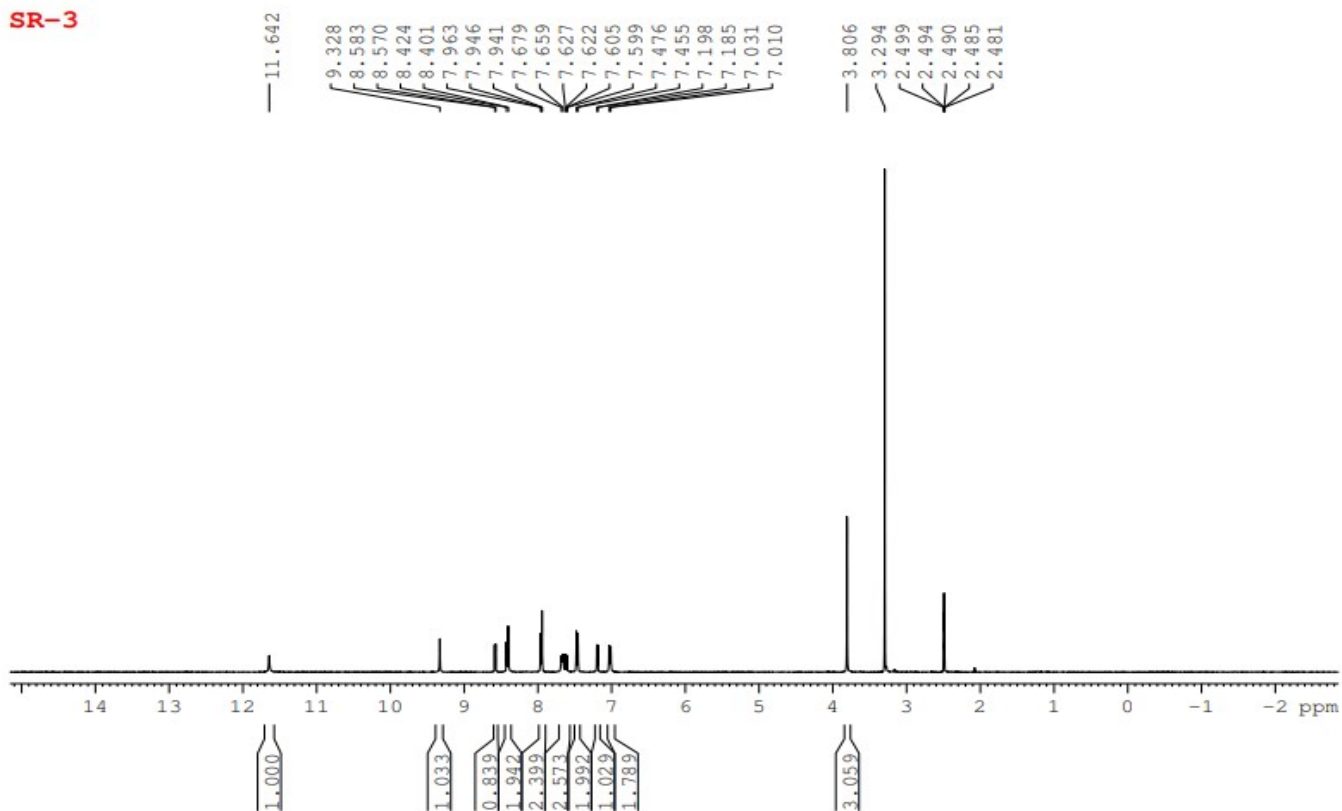

$^1\text{H}$  NMR (400 MHz,  $\delta$ , ppm) spectra of compound 6f

SR-3

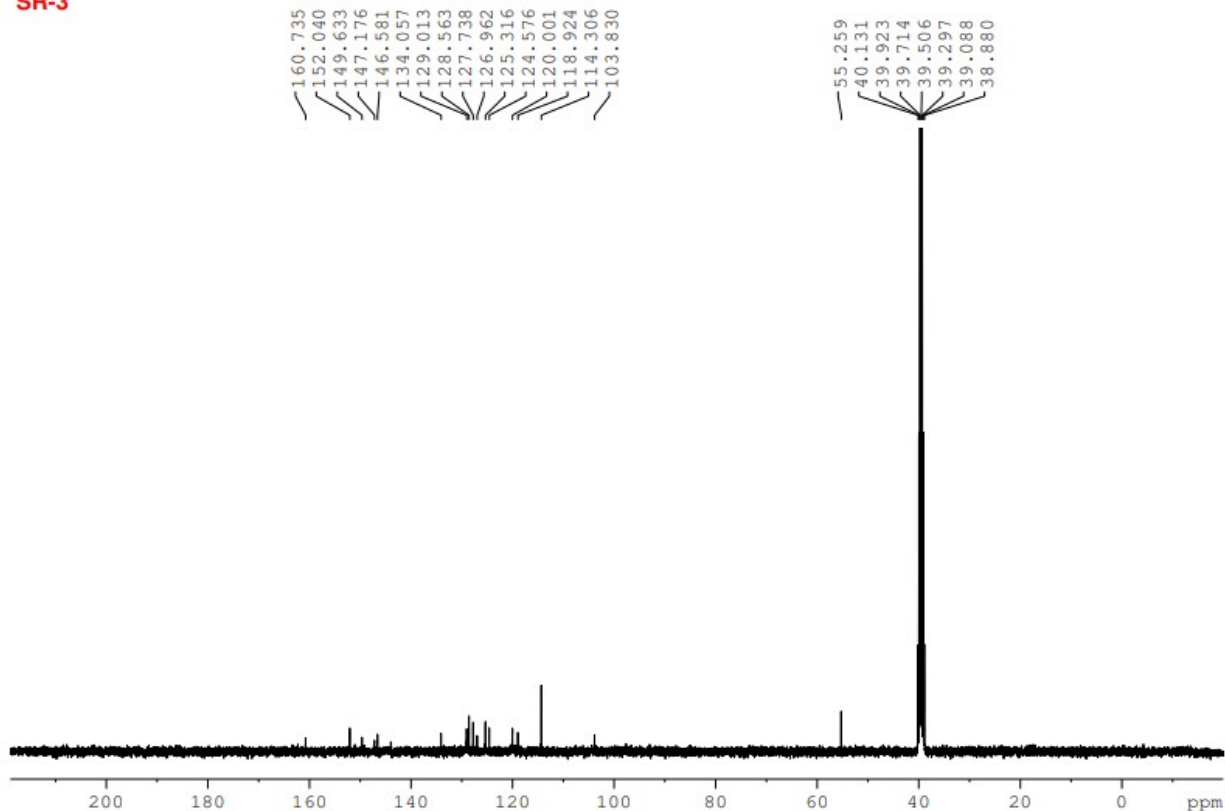

<sup>13</sup>C NMR (400 MHz, δ, ppm) spectra of compound 6f

User : Admin  
 Sample : SR-3  
 Inj. Volume : 5.000  
 Data Name : D:\lcms-data-c\SR-3-APCI-POS1.qld  
 Method Name : C:\LCMSsolution\User\Method\esi.qlm

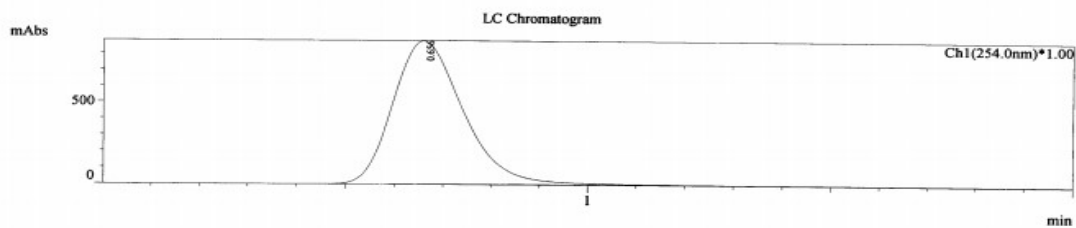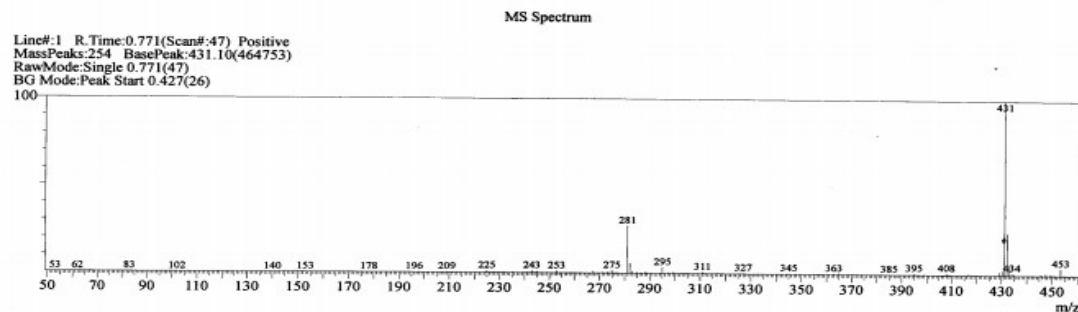

| Peak# | R.Time | I.Time | F.Time | Area     | Height  | A/H   | Mark | %Total | Name | Base m/z | Base Int. |
|-------|--------|--------|--------|----------|---------|-------|------|--------|------|----------|-----------|
| 1     | 0.771  | 0.427  | 1.460  | 42640671 | 1373942 | 31.03 |      | 100.00 |      | 431.10   | 464753    |
|       |        |        |        | 42640671 | 1373942 |       |      | 100.00 |      |          |           |

LC-MS spectra of compound 6f

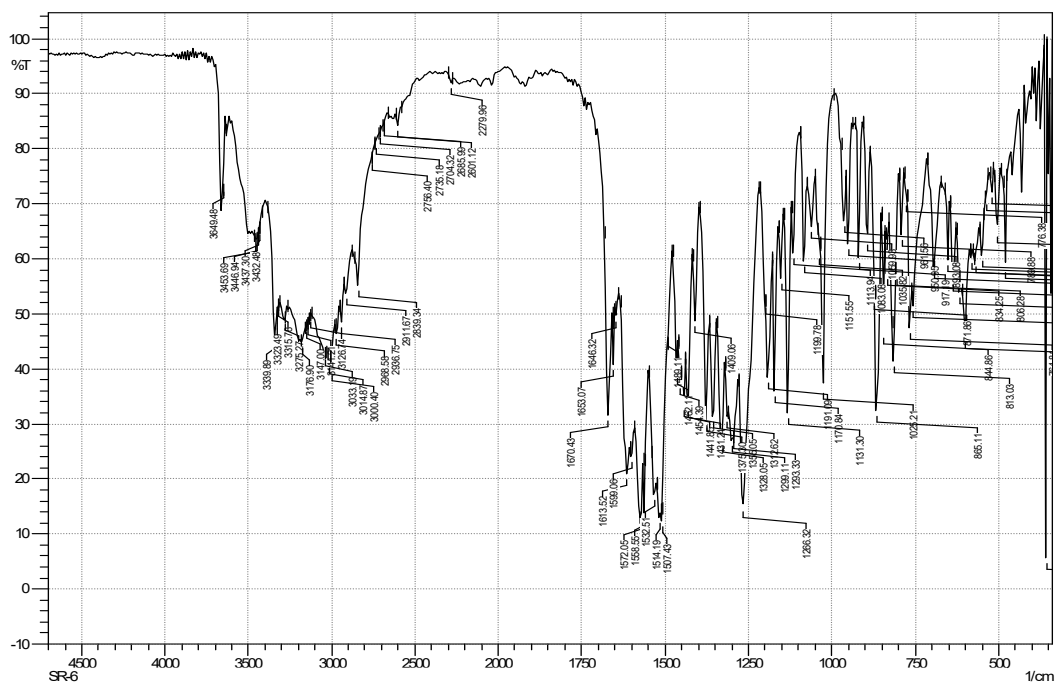

SR-6

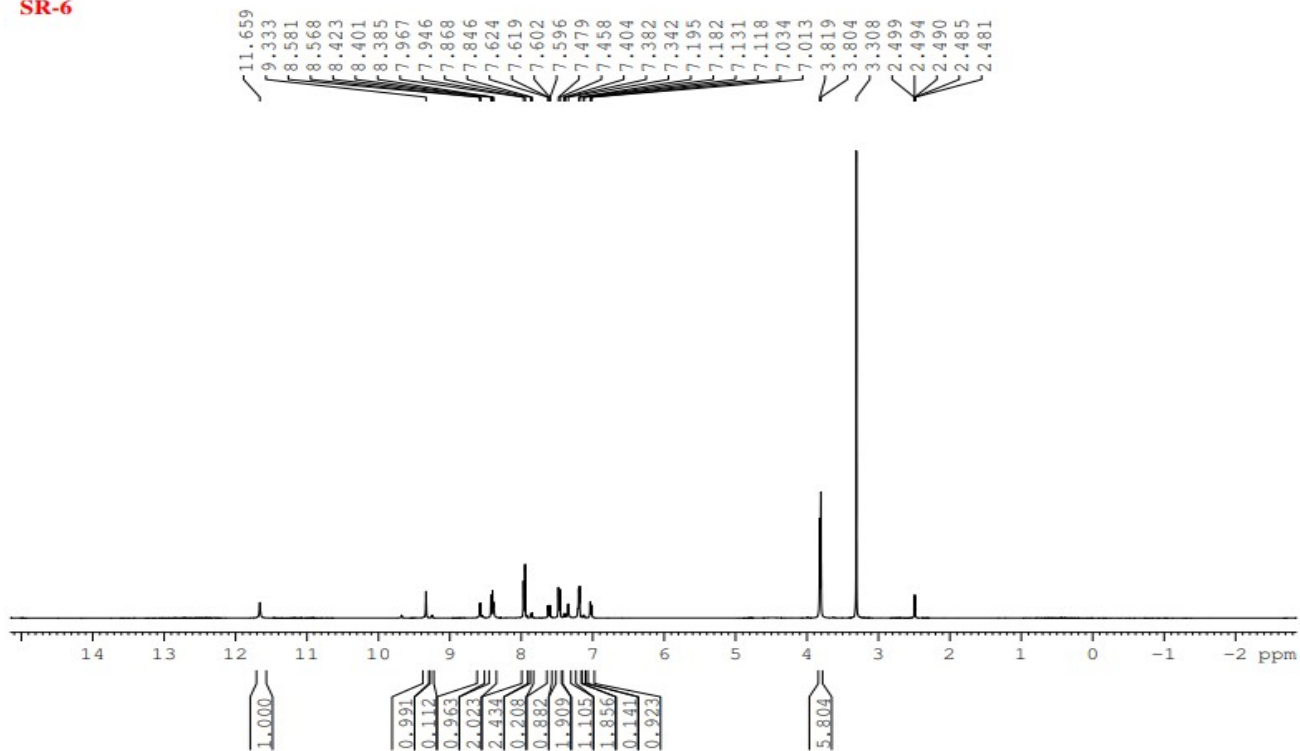

SR-6

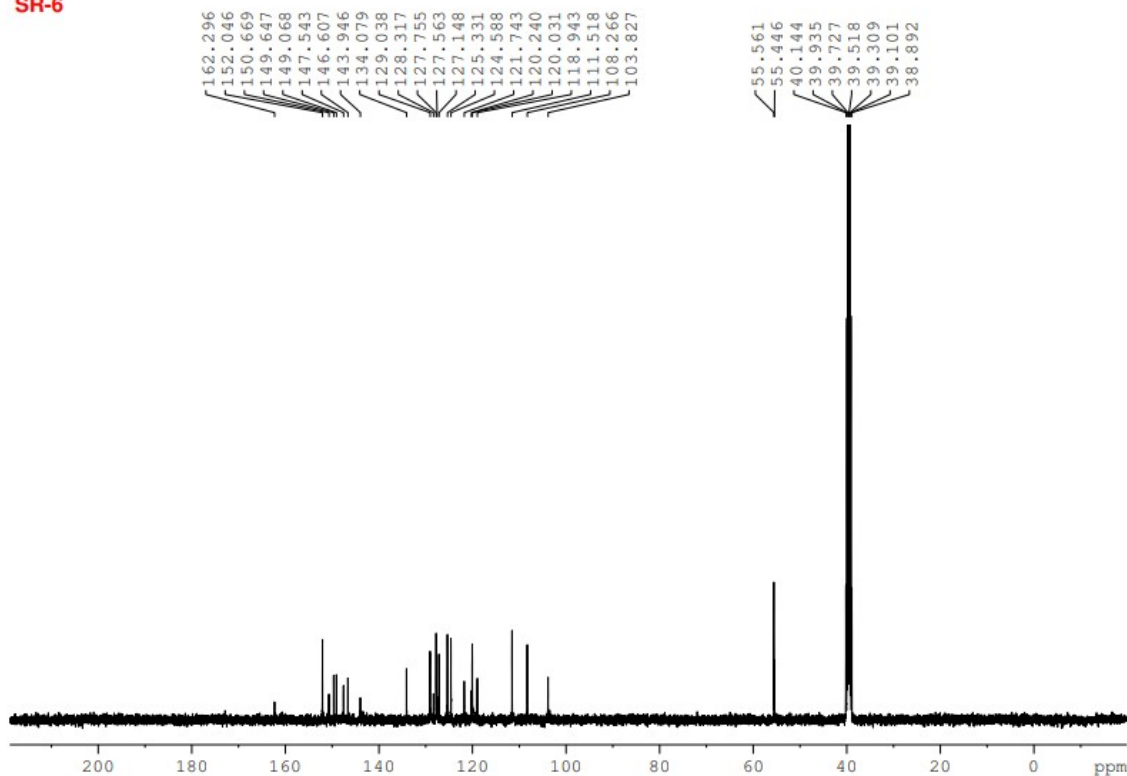

<sup>13</sup>C NMR (400 MHz, δ, ppm) spectra of compound 6g

User : Admin  
 Sample : SR-6  
 Inj. Volume : 5.000  
 Data Name : D:\lcms-data-c\SR-6-APCI-POS1.qld  
 Method Name : C:\LCMSsolution\User\Method\esi.qlm

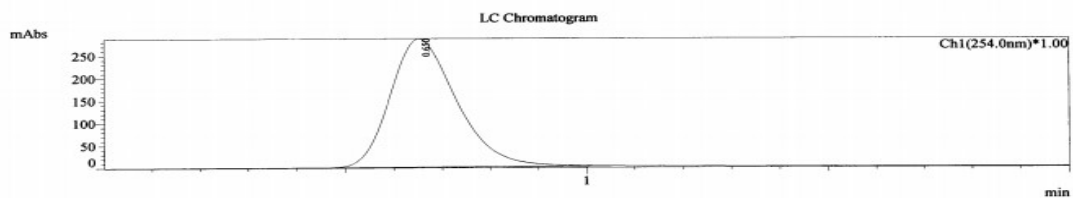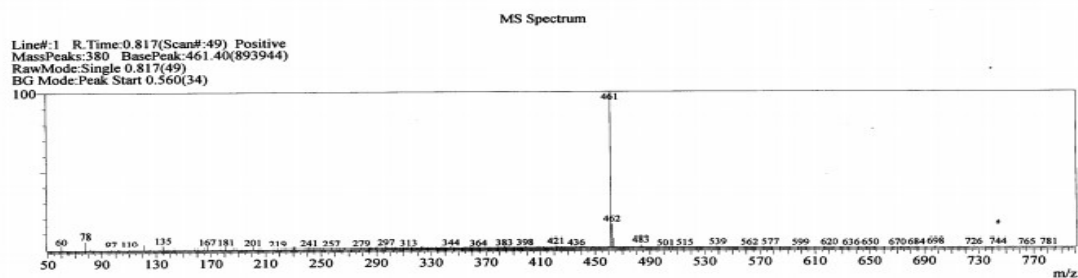

| Peak# | R.Time | I.Time | F.Time | Area     | Height  | A/H   | Mark | %Total | Name | Base m/z | Base Int. |
|-------|--------|--------|--------|----------|---------|-------|------|--------|------|----------|-----------|
| 1     | 0.817  | 0.560  | 1.143  | 20378433 | 1393488 | 14.62 |      | 100.00 |      | 461.40   | 893944    |
|       |        |        |        | 20378433 | 1393488 |       |      | 100.00 |      |          |           |

LC-MS spectra of compound 6g

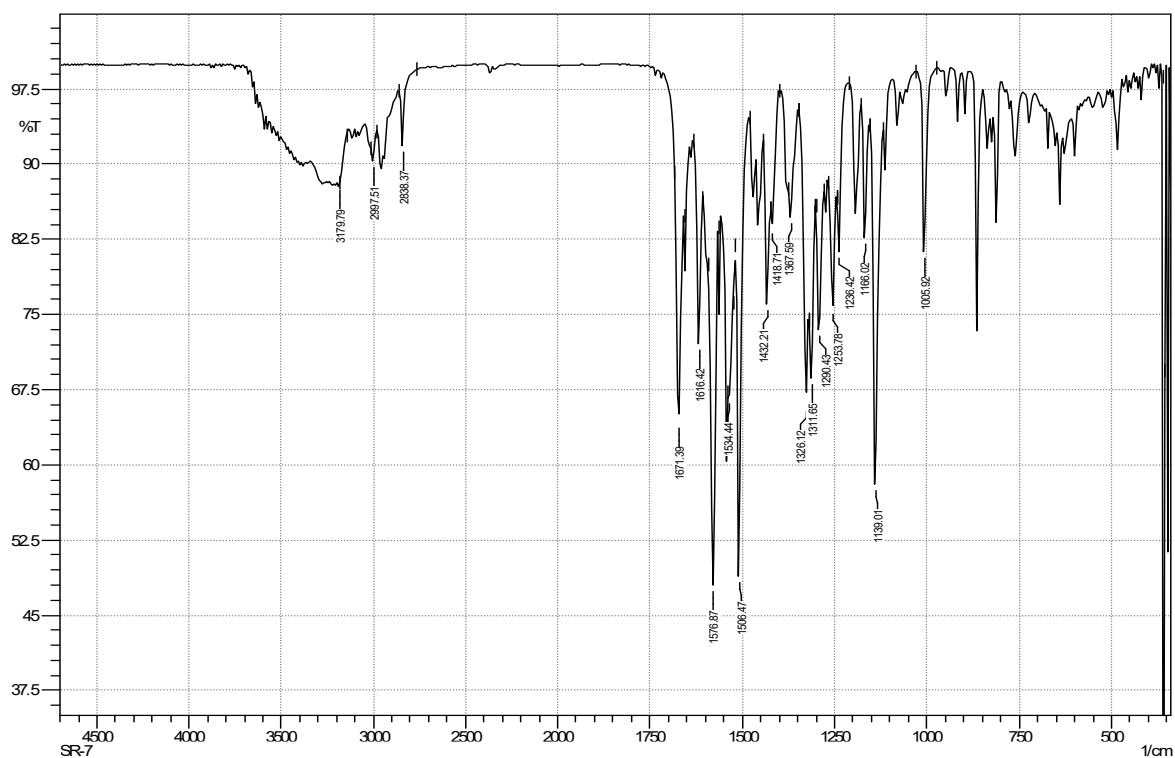

FTIR (KBr,  $\text{cm}^{-1}$ ) spectra of compound 6h

SR-7

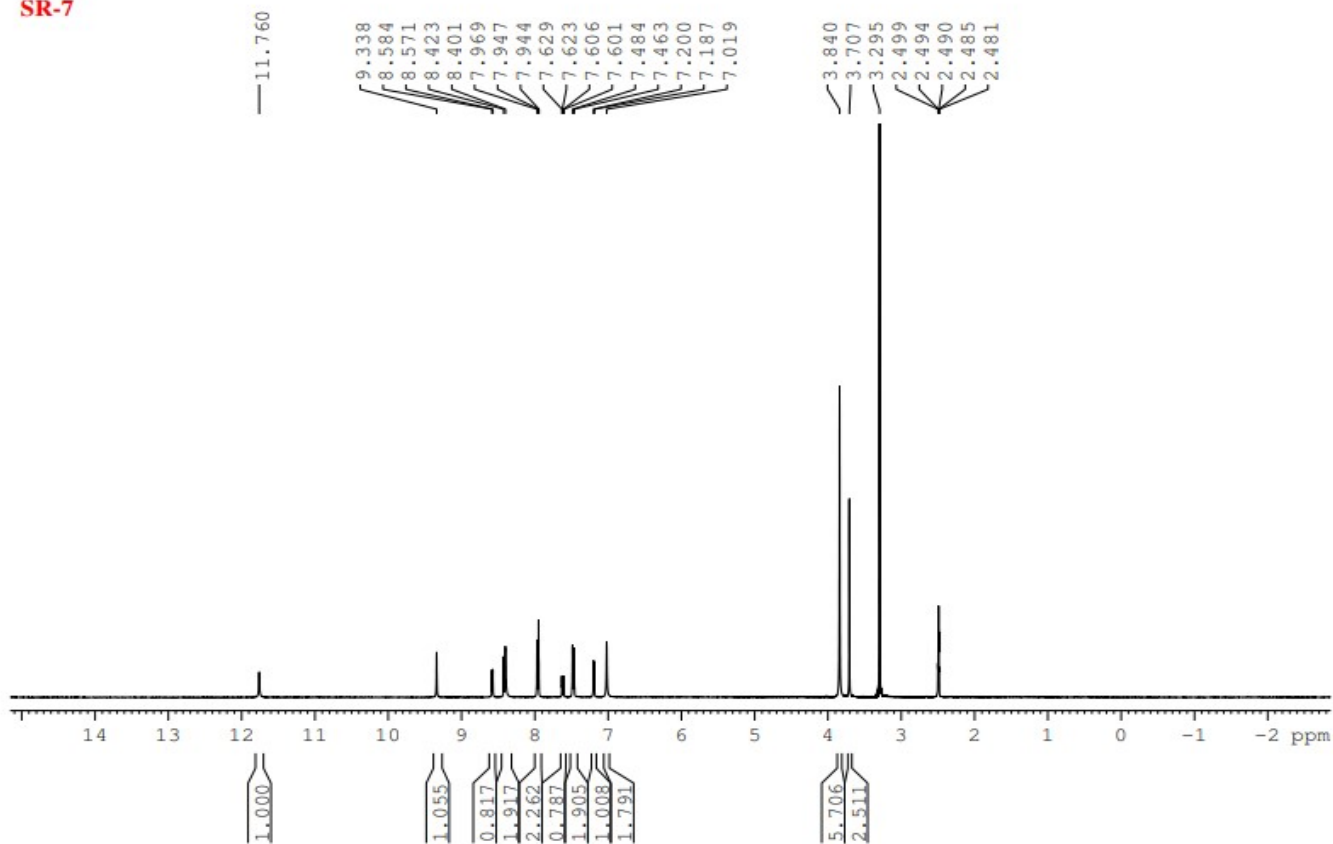

$^1\text{H}$  NMR (400 MHz,  $\delta$ , ppm) spectra of compound 6h



SR-7

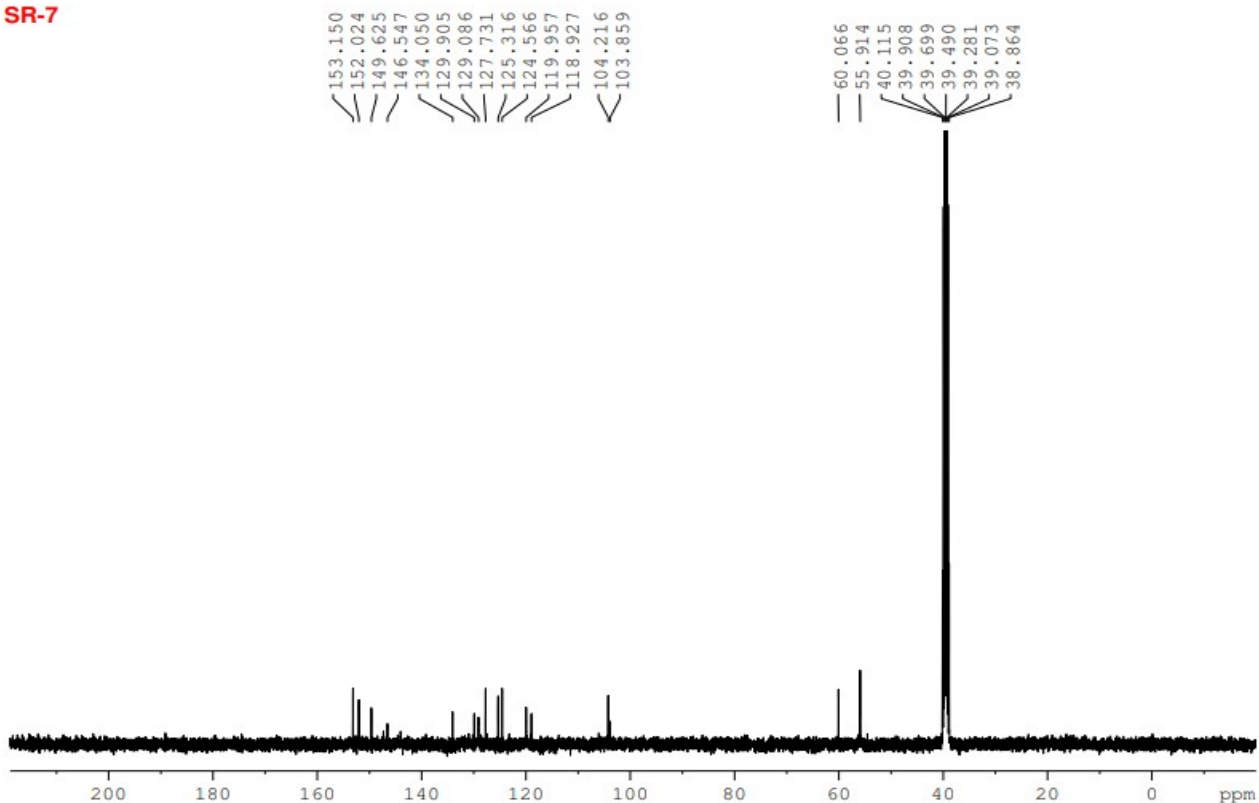

$^{13}\text{C}$  NMR (400 MHz,  $\delta$ , ppm) spectra of compound 6h

User : Admin  
Sample : SR-7  
Inj. Volume : 5.000  
Data Name : D:\lcms-data-c\SR-7-APCI-NEG1.qld  
Method Name : C:\LCMSsolution\User\Method\esi.qlm

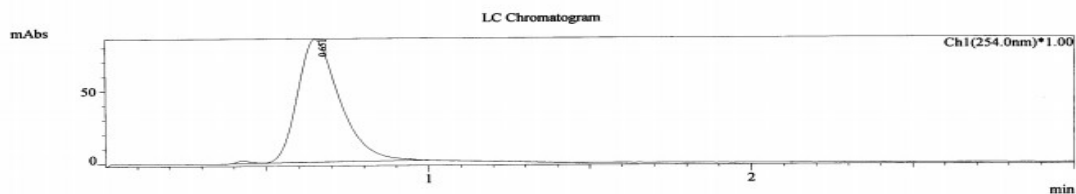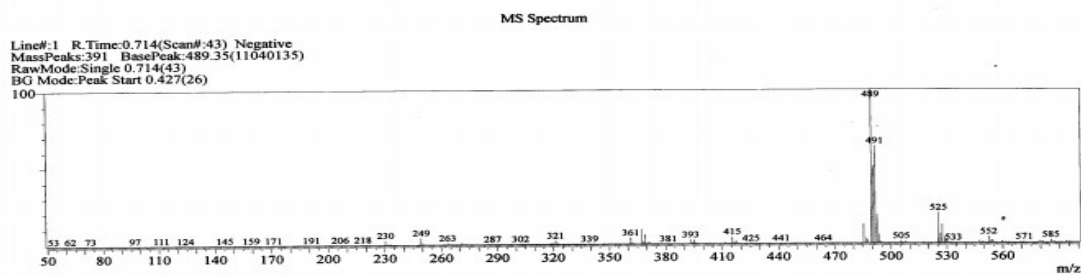

| Peak# | R.Time | I.Time | F.Time | Area      | Height   | A/H   | Mark | %Total | Name | Base m/z | Base Int. |
|-------|--------|--------|--------|-----------|----------|-------|------|--------|------|----------|-----------|
| 1     | 0.714  | 0.427  | 1.043  | 817424646 | 43634230 | 18.73 |      | 100.00 |      | 489.35   | 11040135  |

LC-MS spectra of compound 6h

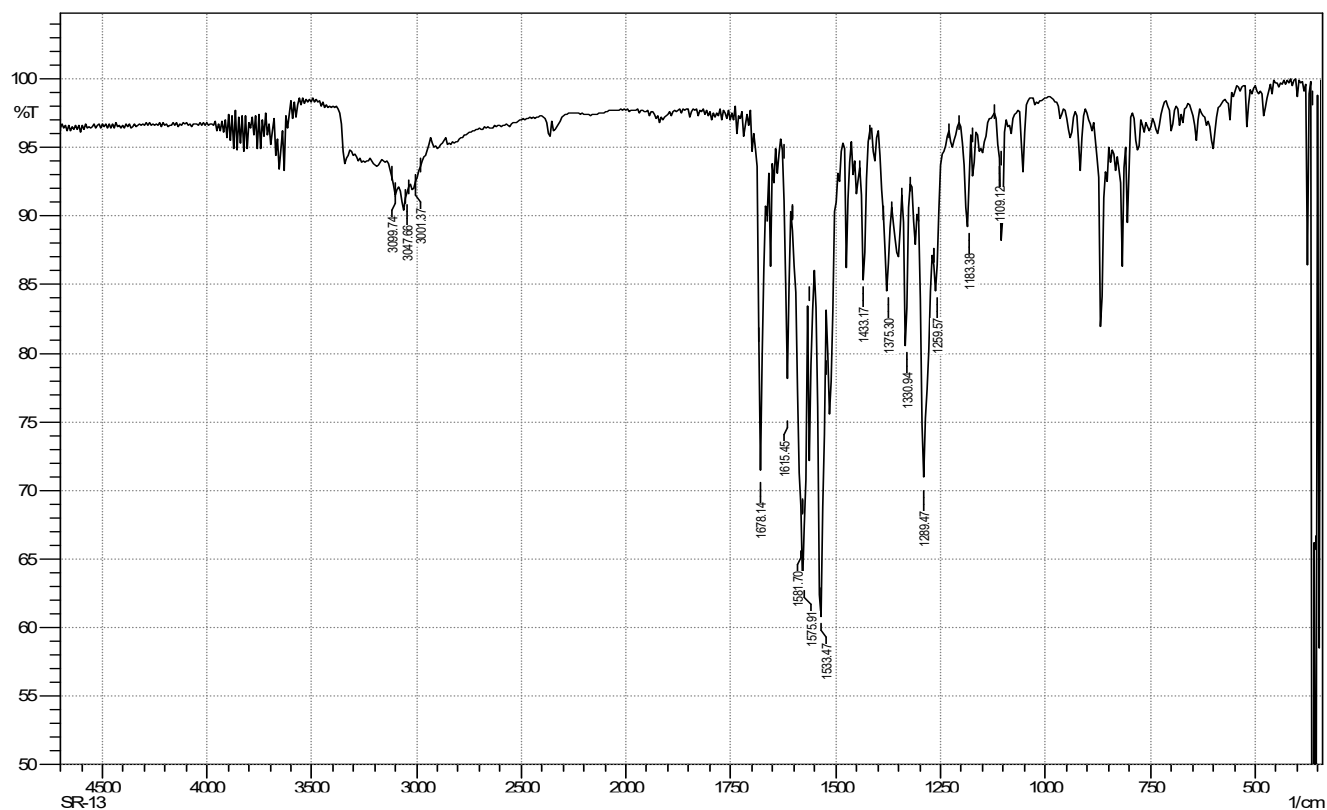

FTIR (KBr,  $\text{cm}^{-1}$ ) spectra of compound 6i

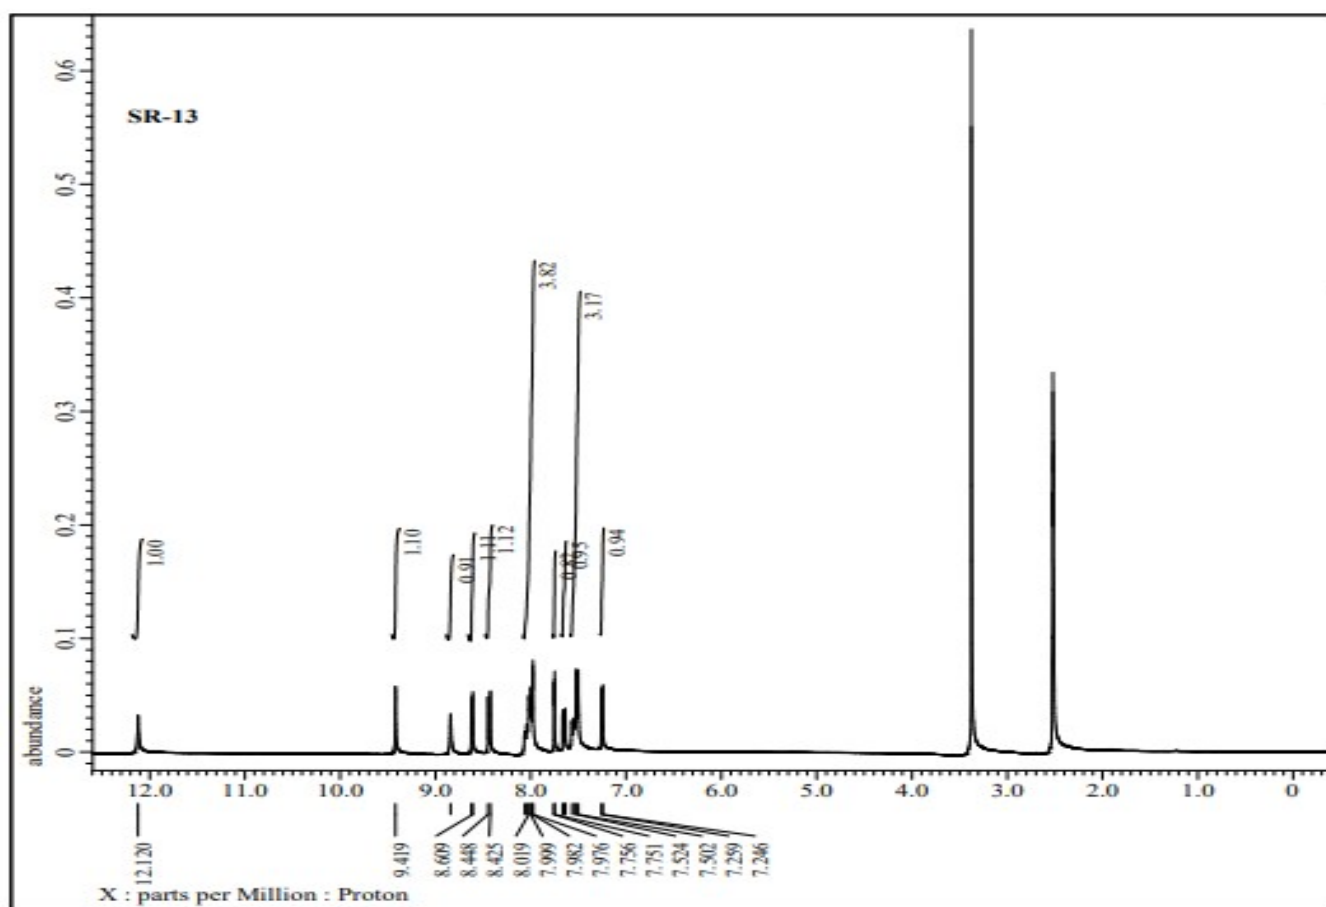

<sup>1</sup>H NMR (400 MHz, δ, ppm) spectra of compound 6i

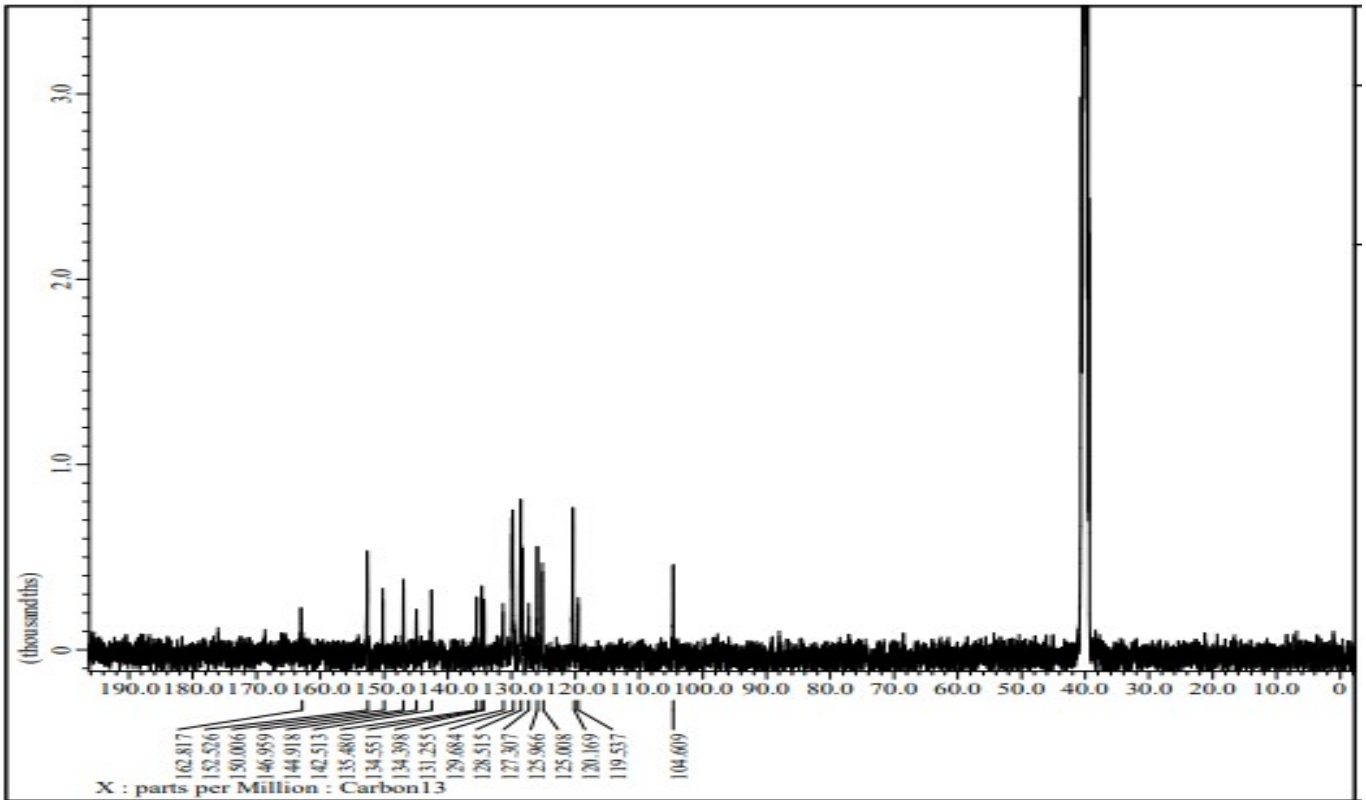

<sup>13</sup>C NMR (400 MHz, δ, ppm) spectra of compound 6i

User : Admin  
 Sample : SR-13  
 Inj. Volume : 5.000  
 Data Name : D:\lcms-data-g\SR-13-APCI-POS1.qld  
 Method Name : C:\LCMSsolution\User\Method\COPY of JAY-4-APCI.qlm

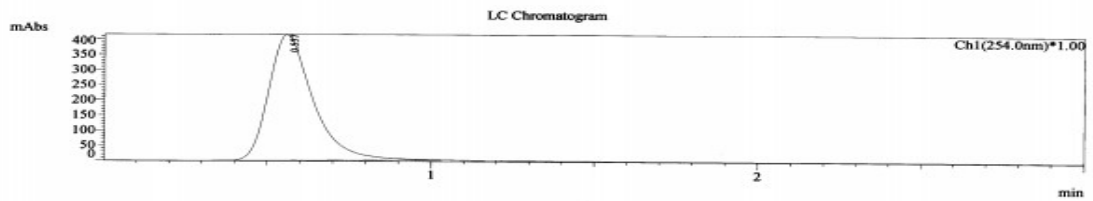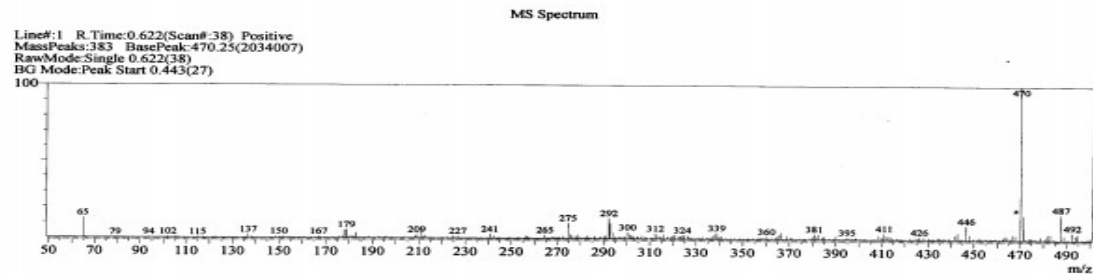

| Peak# | R.Time | I.Time | F.Time | Area      | Height   | A/H  | Mark | %Total | Name | Base m/z | Base Int. |
|-------|--------|--------|--------|-----------|----------|------|------|--------|------|----------|-----------|
| 1     | 0.622  | 0.443  | 0.843  | 237171585 | 25460835 | 9.31 |      | 100.00 |      | 470.25   | 2034007   |
|       |        |        |        | 237171585 | 25460835 |      |      | 100.00 |      |          |           |

LC-MS spectra of compound 6i

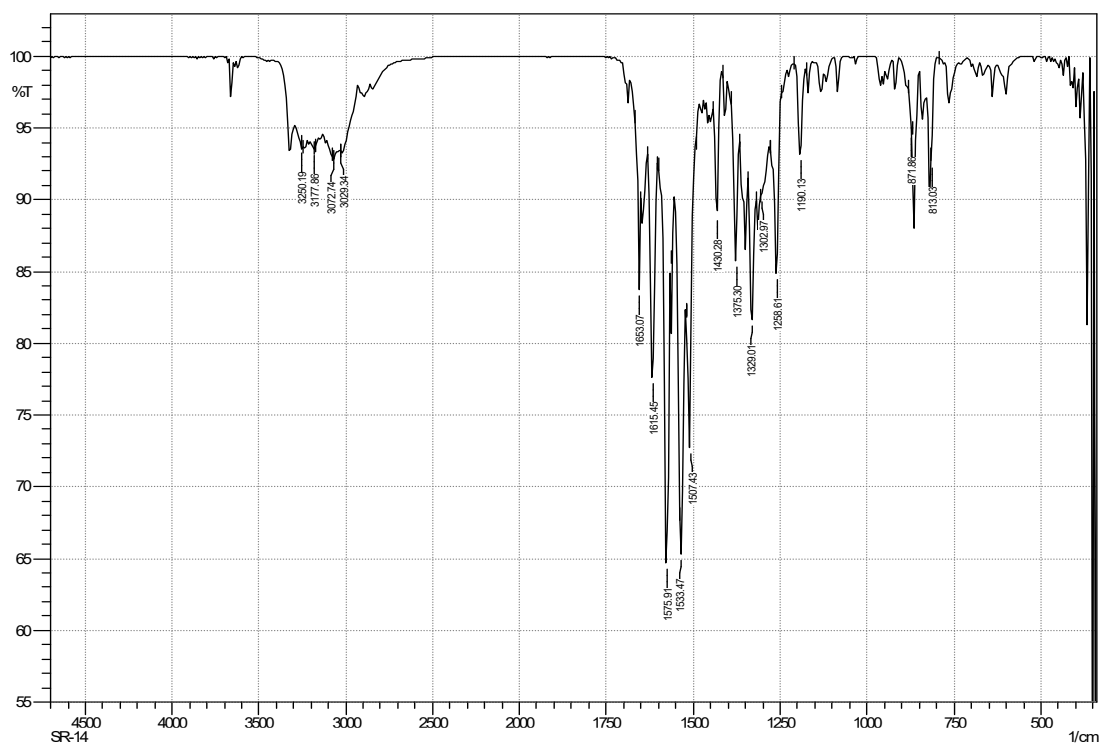

FTIR (KBr, cm<sup>-1</sup>) spectra of compound 6j

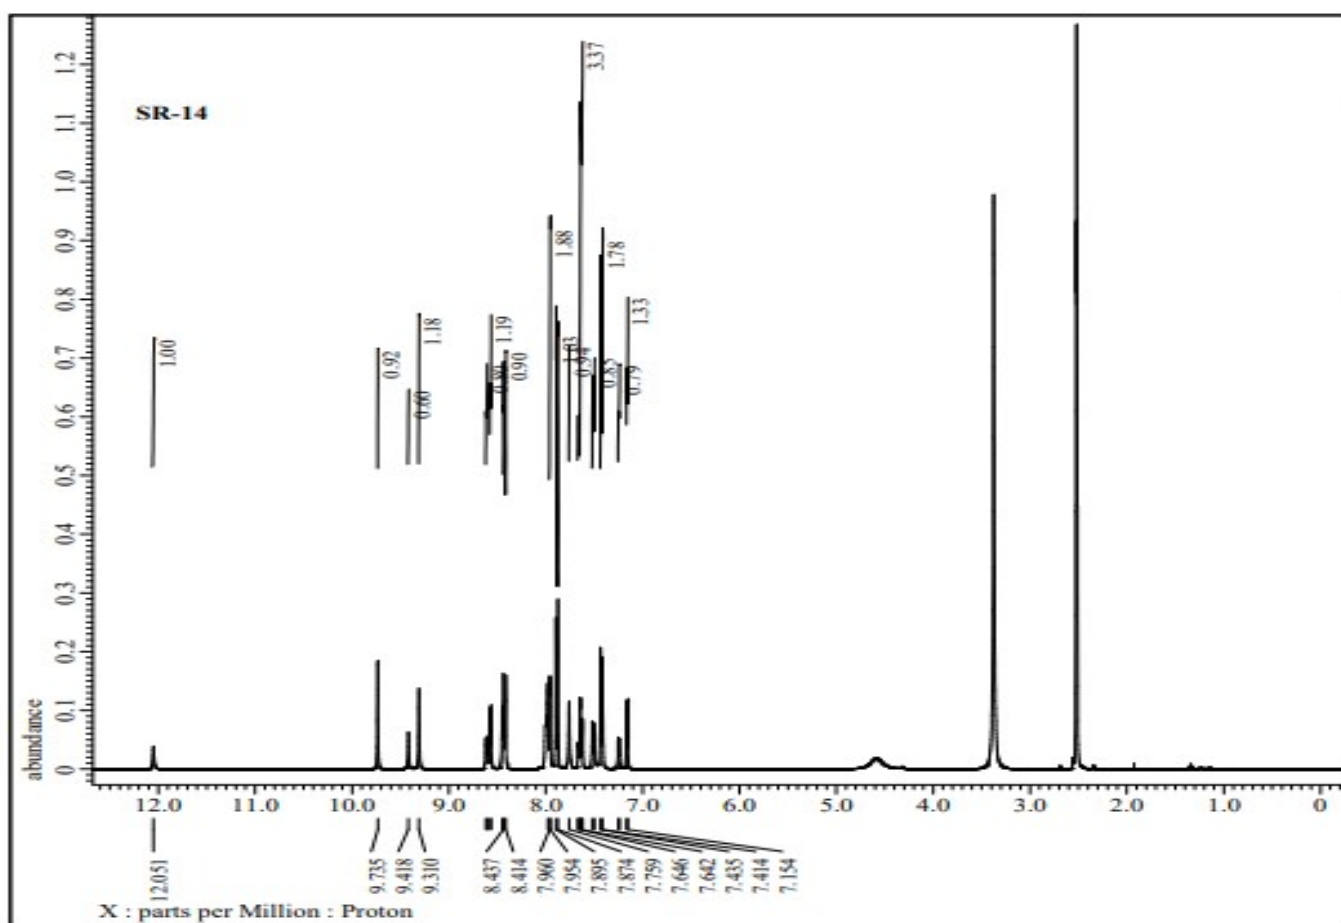

<sup>1</sup>H NMR (400 MHz, δ, ppm) spectra of compound 6j

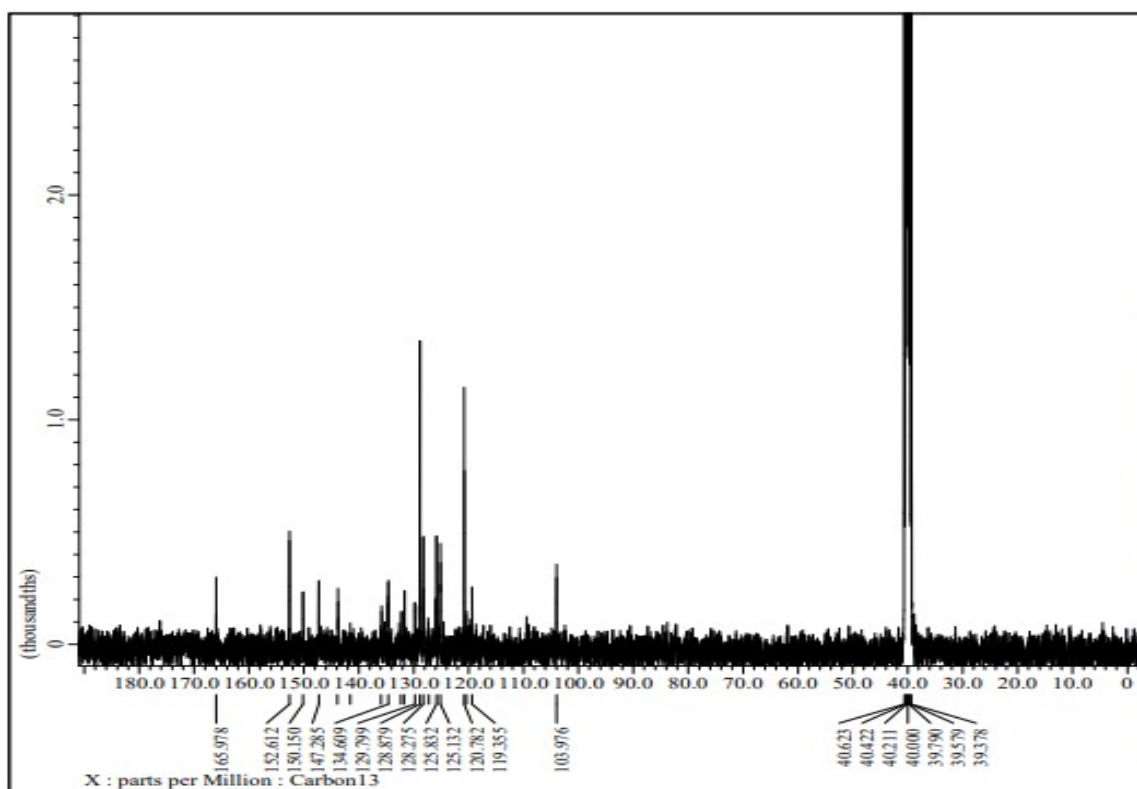

<sup>13</sup>C NMR (400 MHz, δ, ppm) spectra of compound 6j

User : Admin  
 Sample : SR-14  
 Inj. Volume : 5.000  
 Data Name : D:\lcms-data1-c\SR-14-APCI-POS1.qld  
 Method Name : C:\LCMSsolution\User\Method\esi.qlm

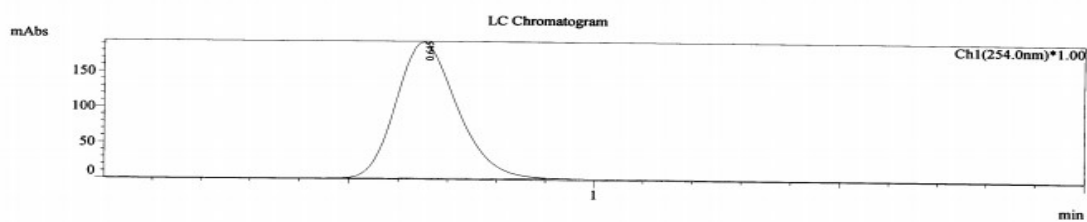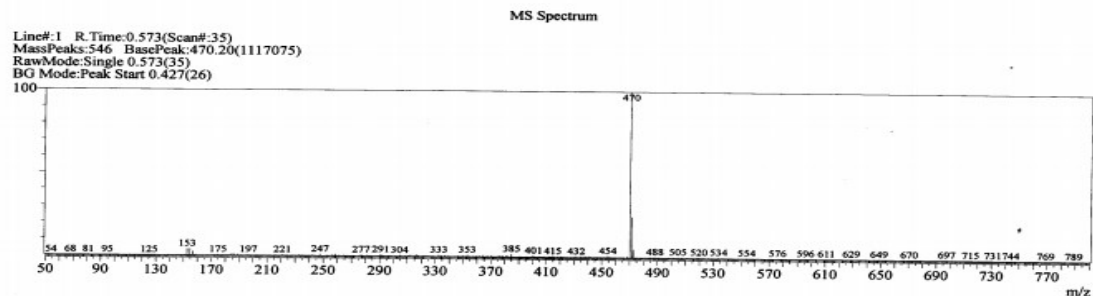

Line# 1 R.Time:0.573(Scan#:35)  
 MassPeaks:546 BasePeak:470.20(1117075)  
 RawMode:Single 0.573(35)  
 BG Mode:Peak Start 0.427(26)

| Peak# | R.Time | I.Time | F.Time | Area     | Height  | A/H   | Mark | %Total | Name | Base m/z | Base Int. |
|-------|--------|--------|--------|----------|---------|-------|------|--------|------|----------|-----------|
| 1     | 0.573  | 0.427  | 0.960  | 22193071 | 1990096 | 11.15 |      | 100.00 |      | 470.20   | 1117075   |

LC-MS spectra of compound 6j

| <b>Title</b> | <b>Survival Score</b> | <b>Site Score</b> | <b>Vector Score</b> | <b>Volume Score</b> | <b>BEDROC Score</b> | <b>PhaseHypoScore</b> |
|--------------|-----------------------|-------------------|---------------------|---------------------|---------------------|-----------------------|
| AADRR_1      | 5.069738              | 0.991397          | 0.955287            | 0.73662             | 0.98377             | 1.287982              |
| AADRR_3      | 4.905304              | 0.813427          | 0.8755              | 0.715986            | 0.99262             | 1.286918              |
| ADRR_2       | 4.84413               | 0.995019          | 0.941394            | 0.735339            | 0.987352            | 1.278046              |
| AADRR_5      | 4.711901              | 0.723739          | 0.815888            | 0.631069            | 0.988926            | 1.271614              |
| AAARR_2      | 4.739191              | 0.728928          | 0.8424              | 0.635954            | 0.973156            | 1.257552              |
| AAADR_2      | 4.63441               | 0.823841          | 0.908019            | 0.715564            | 0.97829             | 1.256364              |
| ADRR_1       | 4.87274               | 0.992516          | 0.944214            | 0.736519            | 0.962434            | 1.254762              |
| AADR_2       | 4.6006                | 0.992794          | 0.952345            | 0.736964            | 0.973126            | 1.249136              |
| AARR_3       | 4.602119              | 0.690675          | 0.957448            | 0.729225            | 0.863529            | 1.139626              |
| AARR_2       | 4.724841              | 0.790252          | 0.964125            | 0.751729            | 0.842105            | 1.125588              |
| ARRR_2       | 4.674086              | 0.685647          | 0.966347            | 0.716074            | 0.67823             | 0.958646              |

**Table. S1:** Total generated hypothesis.

| <b>Title</b>  | <b>Fitness</b> |
|---------------|----------------|
| 6a            | 2.593529       |
| 6d            | 2.591902       |
| 6c            | 2.590907       |
| 6b            | 2.587568       |
| 6f            | 2.58324        |
| 6h            | 2.583012       |
| 6e            | 2.575609       |
| 6j            | 2.571411       |
| 6i            | 2.565869       |
| 6g            | 2.565004       |
| schrod_417623 | 1.983863       |
| schrod_540219 | 1.980556       |
| schrod_801249 | 1.980008       |
| schrod_652409 | 1.972778       |
| schrod_666306 | 1.960321       |
| schrod_262504 | 1.940985       |
| schrod_277226 | 1.940023       |
| schrod_441781 | 1.927018       |
| schrod_704471 | 1.919194       |
| 6m            | 1.918694       |
| schrod_795607 | 1.918697       |

|               |          |
|---------------|----------|
| schrod_459822 | 1.915985 |
| schrod_650568 | 1.9158   |
| schrod_614928 | 1.9154   |

**Table S2:** Top 10 identified molecules by pharmacophore based screening of designed molecules and Decoy set ligands.

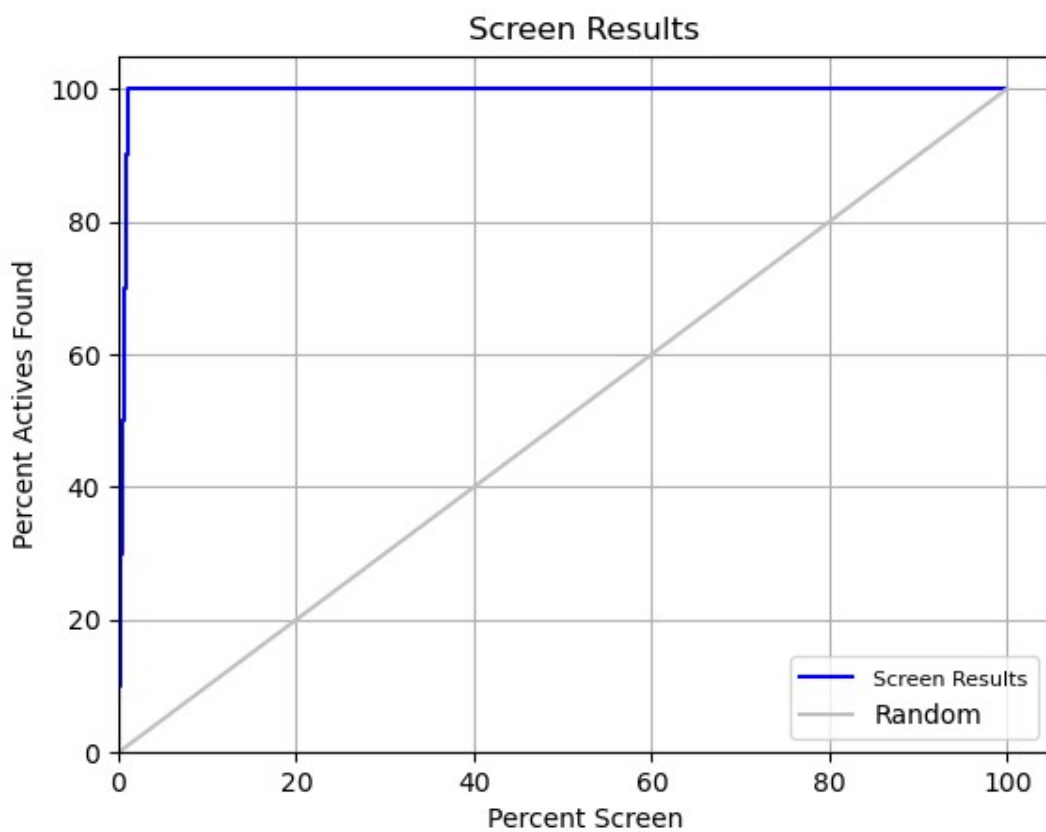

**Fig.S1:** Enrichment analysis plot of pharmacophore based screening.
