# Supplementary material
Source: PubMed Central journal article supplement (PMC11411624)
Supplement: MD-015-D4MD00344F-s002.pdf [file MD-015-D4MD00344F-s002.pdf]

SR-1

6a

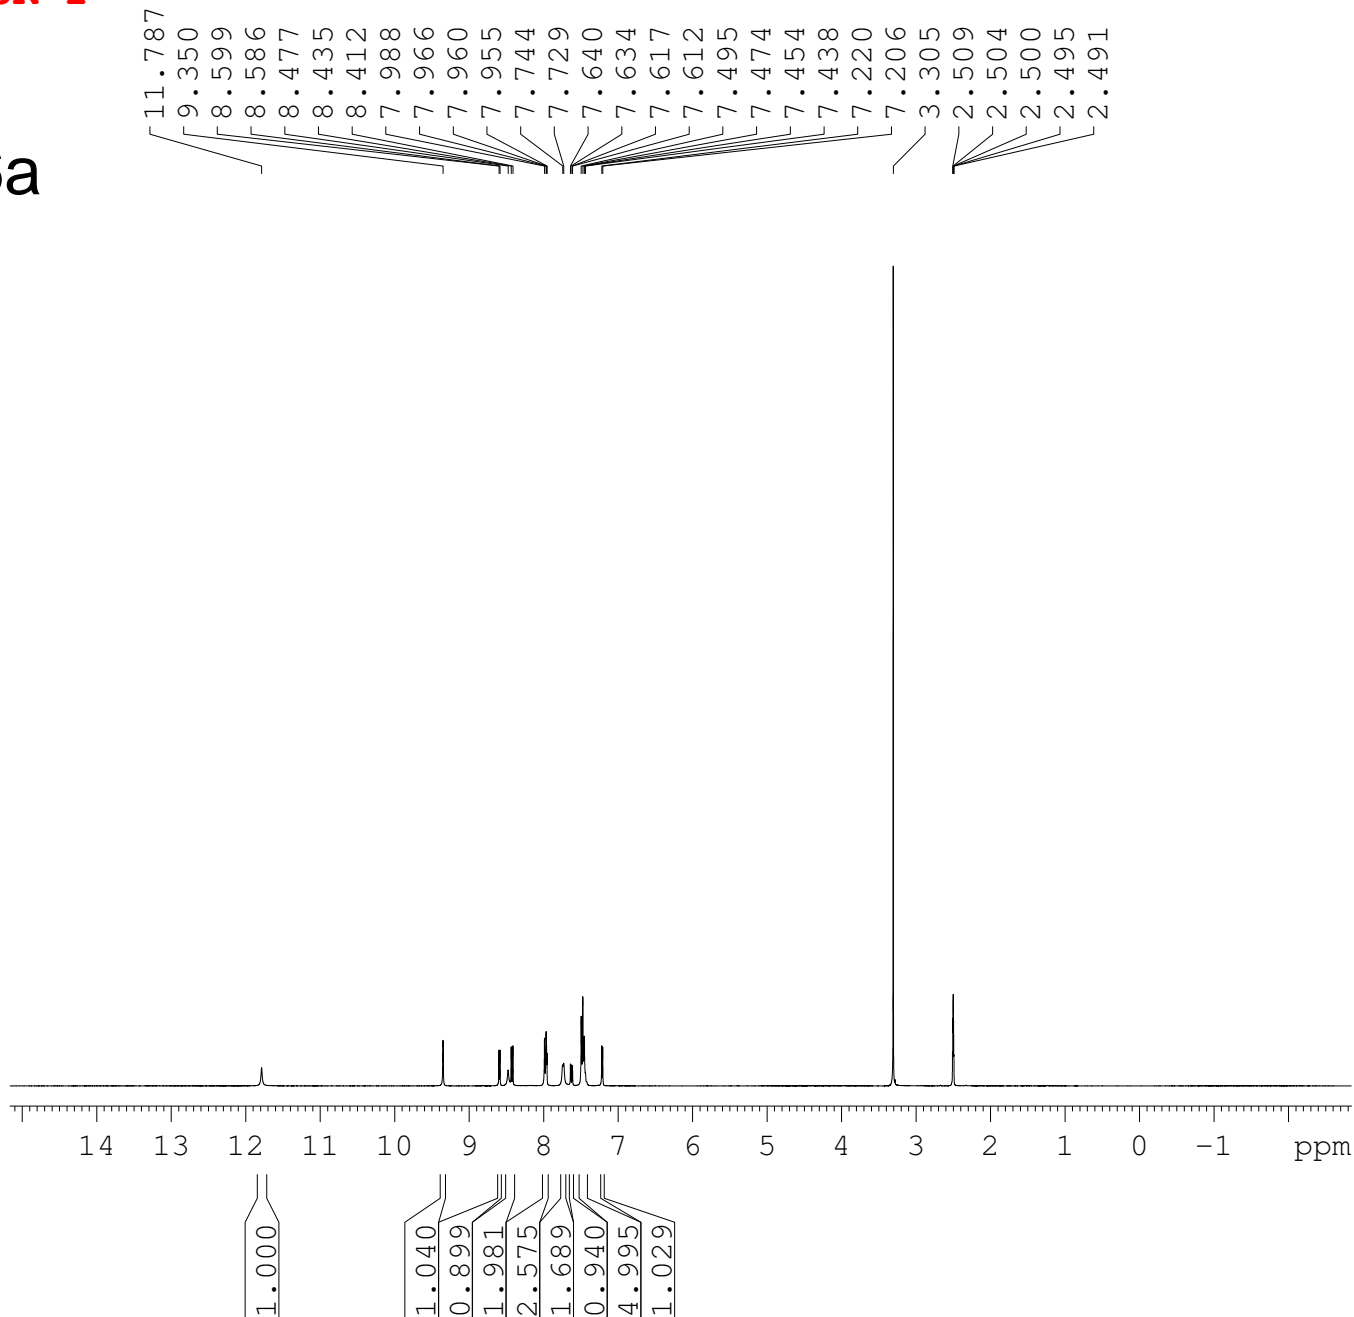

Current Data Parameters  
NAME 20200916-klesga  
EXPNO 2  
PROCNO 1

F2 - Acquisition Parameters  
Date\_ 20200916  
Time 11.44  
INSTRUM spect  
PROBHD 5 mm PABBO BB-  
PULPROG zg  
TD 28844  
SOLVENT DMSO  
NS 32  
DS 0  
SWH 7211.539 Hz  
FIDRES 0.250019 Hz  
AQ 1.9998506 sec  
RG 203  
DW 69.333 usec  
DE 6.50 usec  
TE 298.0 K  
D1 1.00000000 sec  
TD0 1

==== CHANNEL f1 =====  
NUC1 1H  
P1 13.50 usec  
PL1 -3.00 dB  
PL1W 13.42244530 W  
SFO1 400.2324714 MHz

F2 - Processing parameters  
SI 131072  
SF 400.2300061 MHz  
WDW EM  
SSB 0  
LB 0.30 Hz  
GB 0  
PC 1.00

SR-4

6b

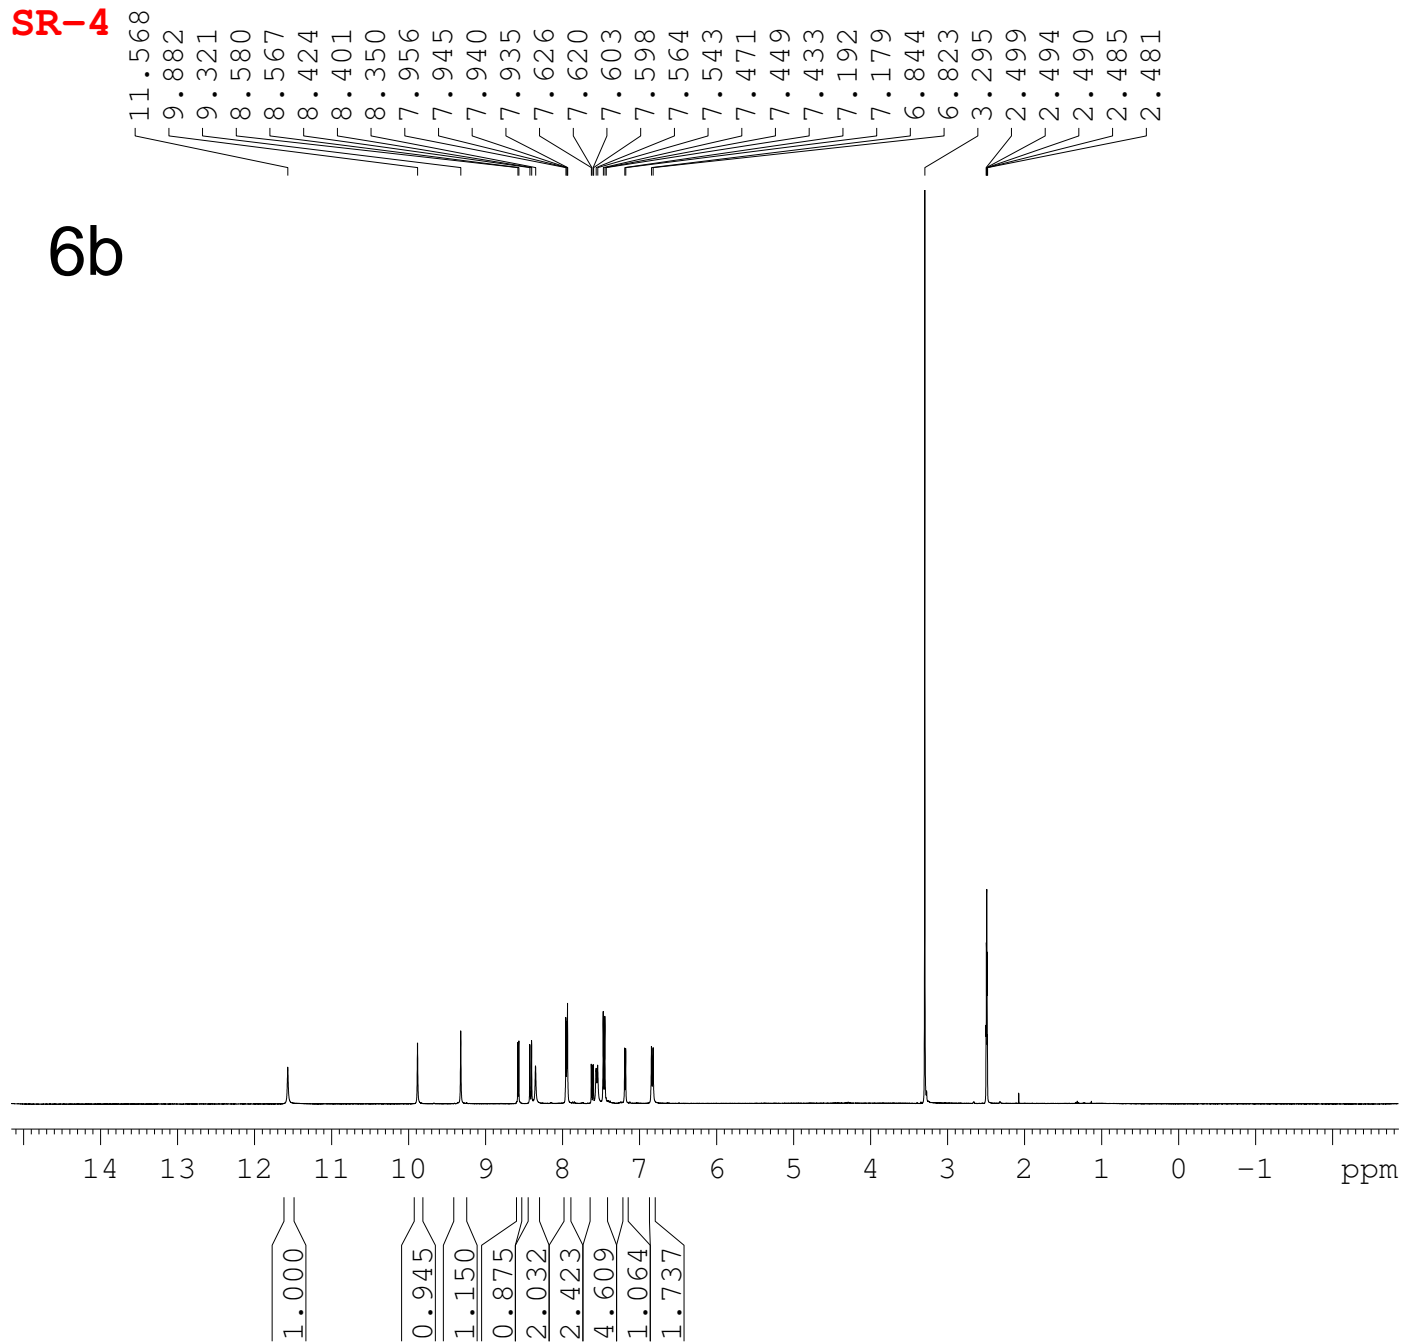

Current Data Parameters  
 NAME 20200610-klesga  
 EXPNO 2  
 PROCNO 1

F2 - Acquisition Parameters  
 Date\_ 20201007  
 Time 11.56  
 INSTRUM spect  
 PROBHD 5 mm PABBO BB-  
 PULPROG zg  
 TD 21632  
 SOLVENT DMSO  
 NS 32  
 DS 0  
 SWH 7211.539 Hz  
 FIDRES 0.333374 Hz  
 AQ 1.4998187 sec  
 RG 203  
 DW 69.333 usec  
 DE 6.50 usec  
 TE 298.1 K  
 D1 1.00000000 sec  
 TD0 1

==== CHANNEL f1 =====  
 NUC1 1H  
 P1 13.50 usec  
 PL1 -3.00 dB  
 PL1W 13.42244530 W  
 SFO1 400.2324716 MHz

F2 - Processing parameters  
 SI 32768  
 SF 400.2300102 MHz  
 WDW EM  
 SSB 0  
 LB 0.30 Hz  
 GB 0  
 PC 1.00

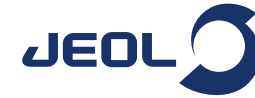

6c

SR-21

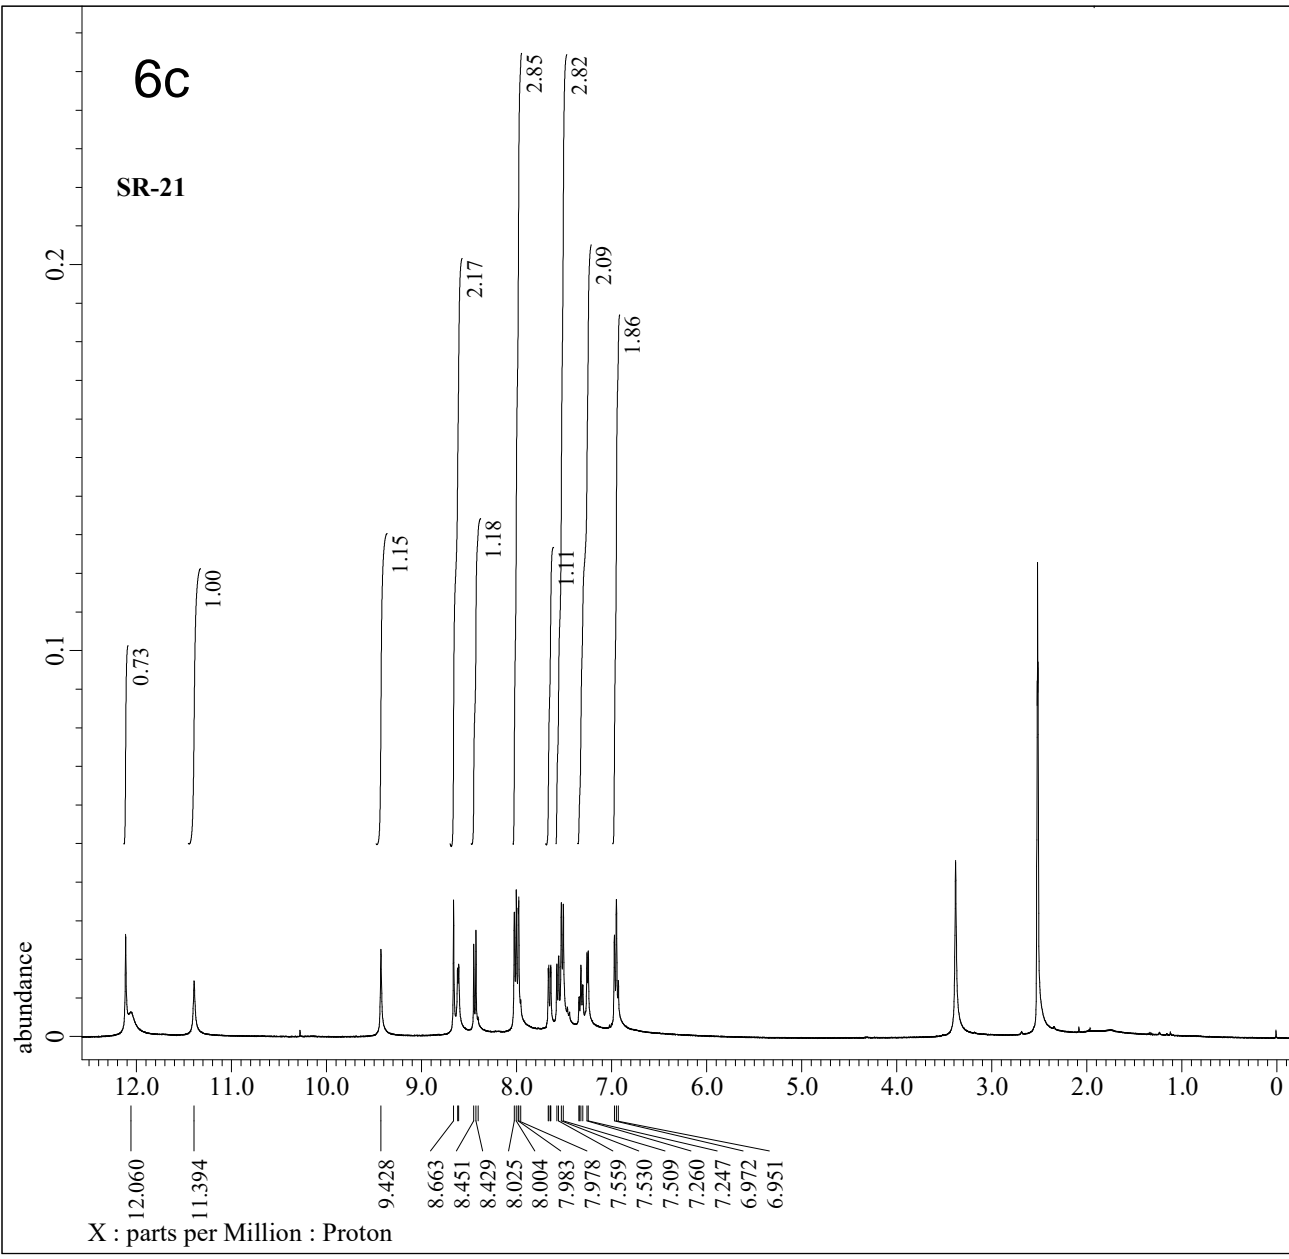

---- PROCESSING PARAMETERS ----  
sexp( 0.4[Hz], 0.0[s] )  
trapezoid( 0[%], 0[%], 80[%], 100[%] )  
zerofill( 4, TRUE )  
fft( 1, TRUE, TRUE )  
machinephase  
ppm  
phase( 1.23102, 0, 62.6688[%] )  
reference( 2.46115[ppm], 2.49[ppm] )  
Derived from: RK\_SR21\_Proton-1-1.jdf

Filename = RK\_SR21\_Proton-  
Author = SAIFKUD  
Experiment = proton.jxp  
Sample\_Id = RK/SR21  
Solvent = DMSO-D6  
Actual\_Start\_Time = 16-APR-2021 11:  
Revision\_Time = 4-JUN-2021 20:

Comment = single\_pulse  
Data\_Format = 1D COMPLEX  
Dim\_Size = 52429  
X\_Domain = Proton  
Dim\_Title = Proton  
Dim\_Units = [ppm]  
Dimensions = X  
Spectrometer = DELTA2\_NMR

Field\_Strength = 9.39094035[T]  
X\_Acq\_Duration = 1.63577856[s]  
X\_Domain = 1H  
X\_Freq = 399.83219794[MH  
X\_Offset = 5[ppm]  
X\_Points = 16384  
X\_Prescans = 1  
X\_Resolution = 0.61132969[Hz]  
X\_Sweep = 10.01602564[kHz]  
X\_Sweep\_Clippped = 8.01282051[kHz]  
Irr\_Domain = Proton  
Irr\_Freq = 399.83219794[MH  
Irr\_Offset = 5[ppm]  
Tri\_Domain = Proton  
Tri\_Freq = 399.83219794[MH  
Tri\_Offset = 5[ppm]  
Blanking = 2[us]  
Clipped = FALSE  
Scans = 32  
Total\_Scans = 32

Relaxation\_Delay = 5[s]  
Recvr\_Gain = 56  
Temp\_Get = 17.1[dC]  
X\_90\_Width = 10.26[us]

SR-2

6d

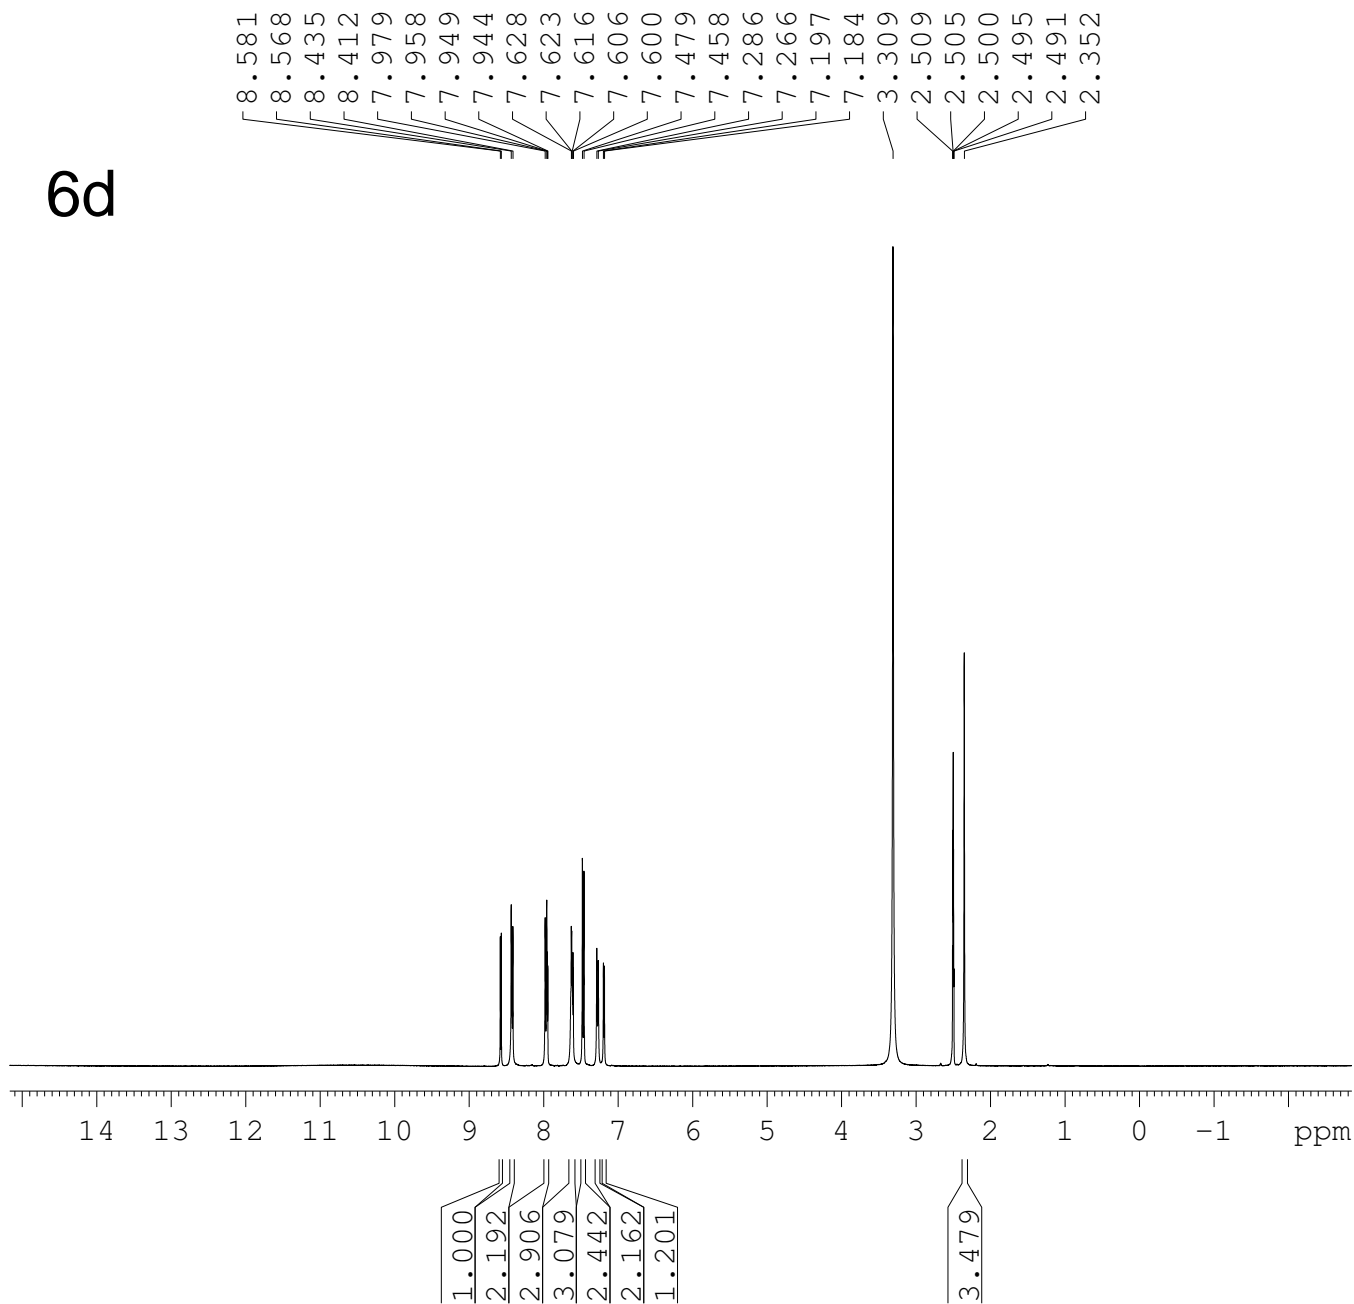

Current Data Parameters  
NAME 20200916-klesga  
EXPNO 1  
PROCNO 1

F2 - Acquisition Parameters  
Date\_ 20200916  
Time 11.39  
INSTRUM spect  
PROBHD 5 mm PABBO BB-  
PULPROG zg  
TD 28844  
SOLVENT DMSO  
NS 32  
DS 0  
SWH 7211.539 Hz  
FIDRES 0.250019 Hz  
AQ 1.9998506 sec  
RG 203  
DW 69.333 usec  
DE 6.50 usec  
TE 298.0 K  
D1 1.00000000 sec  
TD0 1

==== CHANNEL f1 =====  
NUC1 1H  
P1 13.50 usec  
PL1 -3.00 dB  
PL1W 13.42244530 W  
SFO1 400.2324714 MHz

F2 - Processing parameters  
SI 131072  
SF 400.2300060 MHz  
WDW EM  
SSB 0  
LB 0.30 Hz  
GB 0  
PC 1.00



SR-12

6e

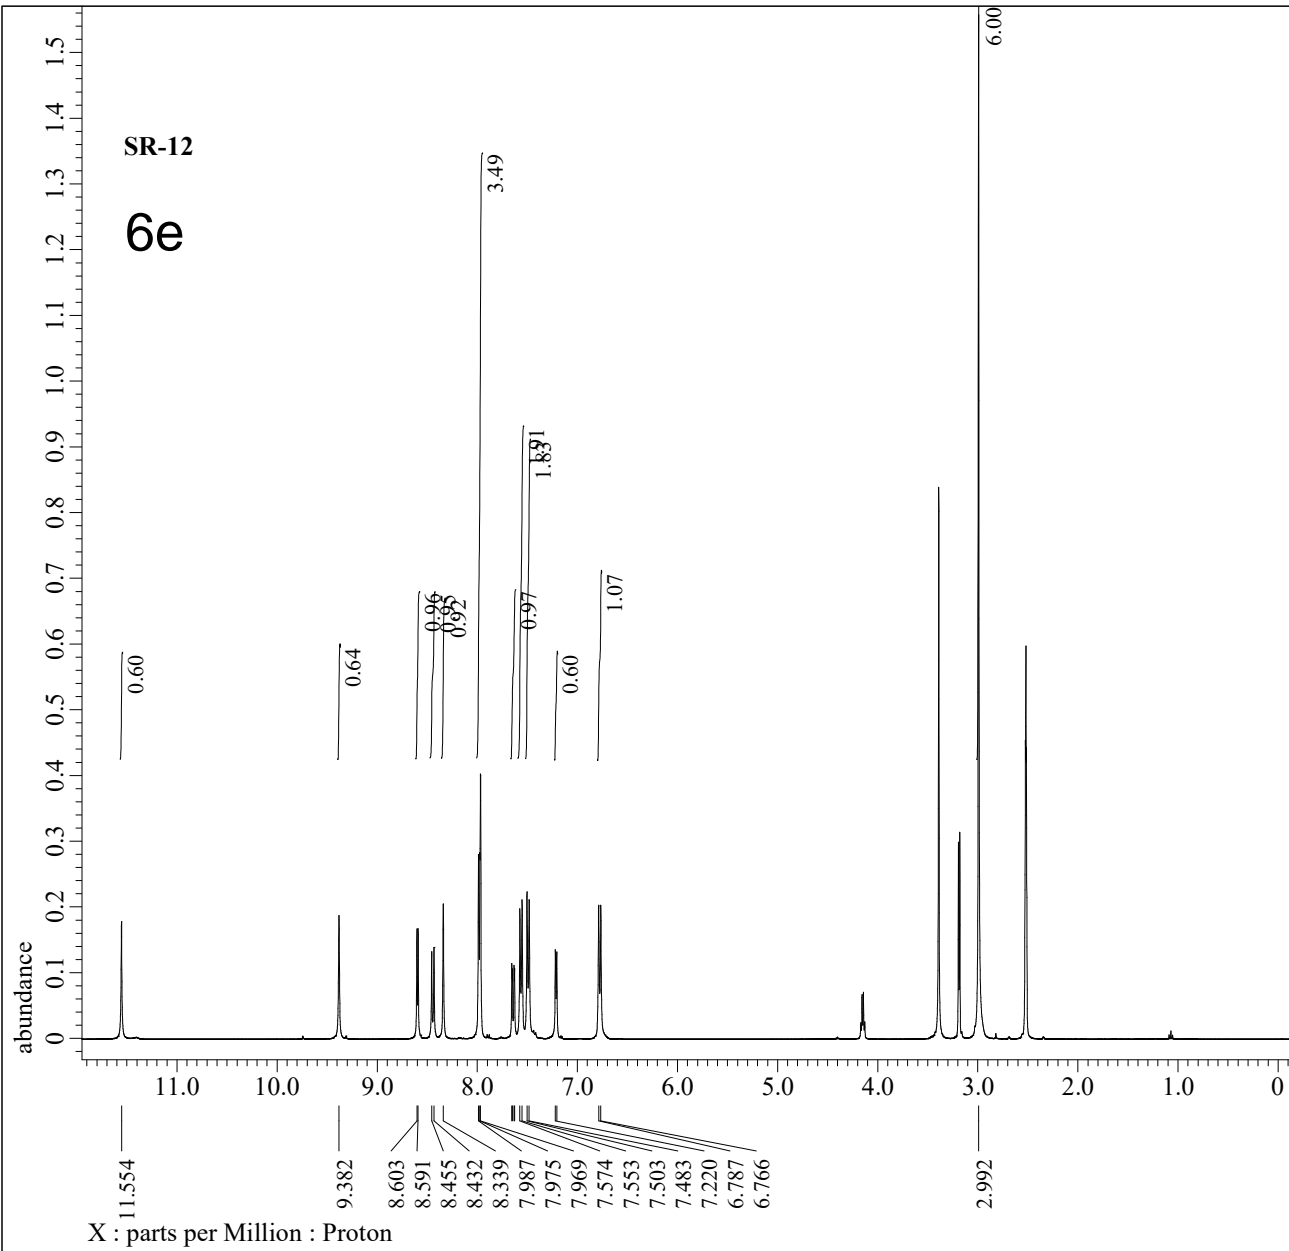

X : parts per Million : Proton

---- PROCESSING PARAMETERS ----  
sexp( 0.2[Hz], 0.0[s] )  
trapezoid( 0[%], 0[%], 80[%], 100[%] )  
zerofill( 1, TRUE )  
fft( 1, TRUE, TRUE )  
machinephase  
ppm  
phase( 0, 0, 62.67358[%] )  
reference( 2.46039[ppm], 2.49[ppm] )  
Derived from: SR-12\_Proton-1-1.jdf

Filename = SR-12 Proton-1-  
Author = SAIFKUD  
Experiment = proton.jxp  
Sample Id = SR-12  
Solvent = DMSO-D6  
Actual\_Start\_Time = 5-DEC-2020 09:  
Revision\_Time = 10-JUN-2021 11:

Comment = single\_pulse  
Data\_Format = 1D COMPLEX  
Dim\_Size = 13107  
X\_Domain = Proton  
Dim\_Title = Proton  
Dim\_Units = [ppm]  
Dimensions = X  
Spectrometer = DELTA2\_NMR

Field\_Strength = 9.39094035[T] (C  
X\_Acq\_Duration = 1.63577856[s]  
X\_Domain = 1H  
X\_Freq = 399.83219794[MH  
X\_Offset = 5[ppm]  
X\_Points = 16384  
X\_Prescans = 1  
X\_Resolution = 0.61132969[Hz]  
X\_Sweep = 10.01602564[kHz]  
X\_Sweep\_Clippped = 8.01282051[kHz]  
Irr\_Domain = Proton  
Irr\_Freq = 399.83219794[MH  
Irr\_Offset = 5[ppm]  
Tri\_Domain = Proton  
Tri\_Freq = 399.83219794[MH  
Tri\_Offset = 5[ppm]  
Blanking = 2[us]  
Clipped = FALSE  
Scans = 32  
Total\_Scans = 32

Relaxation\_Delay = 5[s]  
Recvr\_Gain = 46  
Temp\_Get = 18.5[dC]  
X\_90\_Width = 10.26[us]

SR-3

6f

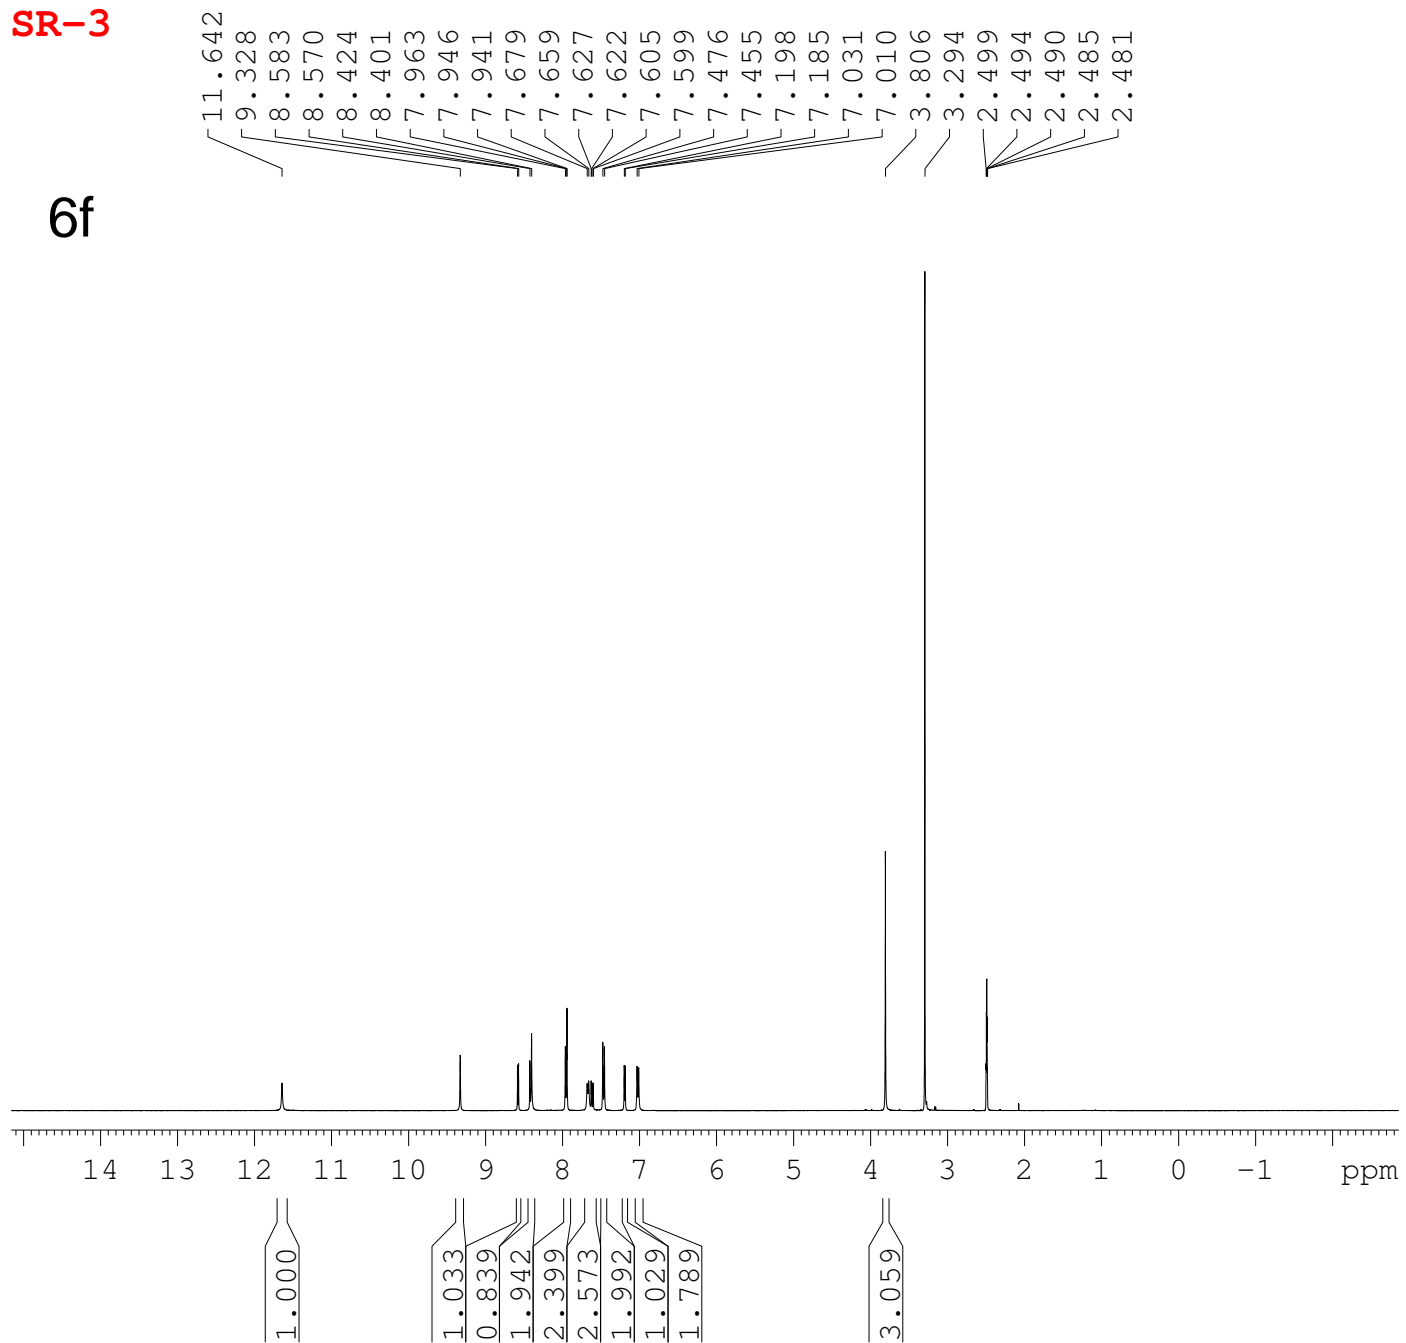

11.642  
9.328  
8.583  
8.570  
8.424  
8.401  
7.963  
7.946  
7.941  
7.679  
7.659  
7.627  
7.622  
7.605  
7.599  
7.476  
7.455  
7.198  
7.185  
7.031  
7.010  
3.806  
3.294  
2.499  
2.494  
2.490  
2.485  
2.481

Current Data Parameters  
NAME 20200610-klesga  
EXPNO 3  
PROCNO 1

F2 - Acquisition Parameters  
Date\_ 20201007  
Time 12.00  
INSTRUM spect  
PROBHD 5 mm PABBO BB-  
PULPROG zg  
TD 21632  
SOLVENT DMSO  
NS 32  
DS 0  
SWH 7211.539 Hz  
FIDRES 0.333374 Hz  
AQ 1.4998187 sec  
RG 203  
DW 69.333 usec  
DE 6.50 usec  
TE 298.1 K  
D1 1.00000000 sec  
TD0 1

==== CHANNEL f1 =====  
NUC1 1H  
P1 13.50 usec  
PL1 -3.00 dB  
PL1W 13.42244530 W  
SFO1 400.2324716 MHz

F2 - Processing parameters  
SI 32768  
SF 400.2300103 MHz  
WDW EM  
SSB 0  
LB 0.30 Hz  
GB 0  
PC 1.00

SR-6

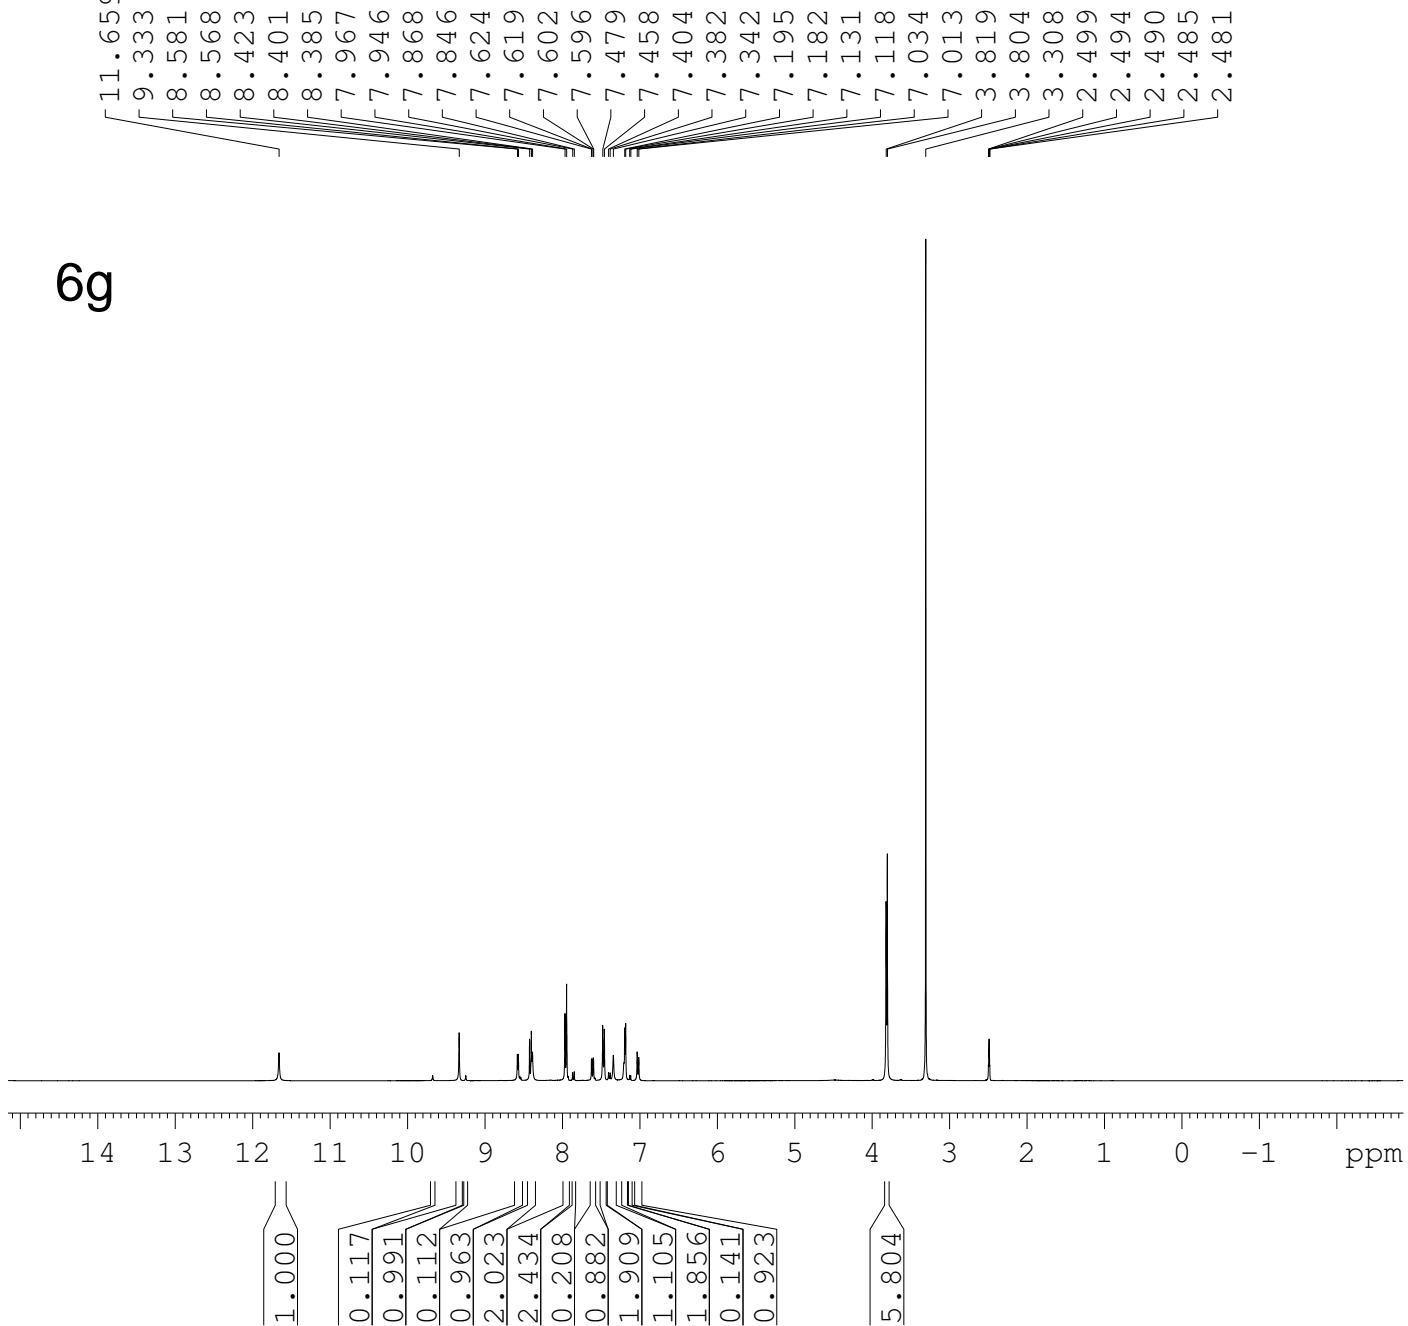

Current Data Parameters  
 NAME 20202010-klesga  
 EXPNO 3  
 PROCNO 1

F2 - Acquisition Parameters  
 Date\_ 20201020  
 Time 15.08  
 INSTRUM spect  
 PROBHD 5 mm PABBO BB-  
 PULPROG zg  
 TD 21632  
 SOLVENT DMSO  
 NS 32  
 DS 0  
 SWH 7211.539 Hz  
 FIDRES 0.333374 Hz  
 AQ 1.4998187 sec  
 RG 203  
 DW 69.333 usec  
 DE 6.50 usec  
 TE 298.0 K  
 D1 1.00000000 sec  
 TD0 1

==== CHANNEL f1 =====  
 NUC1 1H  
 P1 13.50 usec  
 PL1 -3.00 dB  
 PL1W 13.42244530 W  
 SFO1 400.2324716 MHz

F2 - Processing parameters  
 SI 32768  
 SF 400.2300103 MHz  
 WDW EM  
 SSB 0  
 LB 0.30 Hz  
 GB 0  
 PC 1.00

SR-7

6h

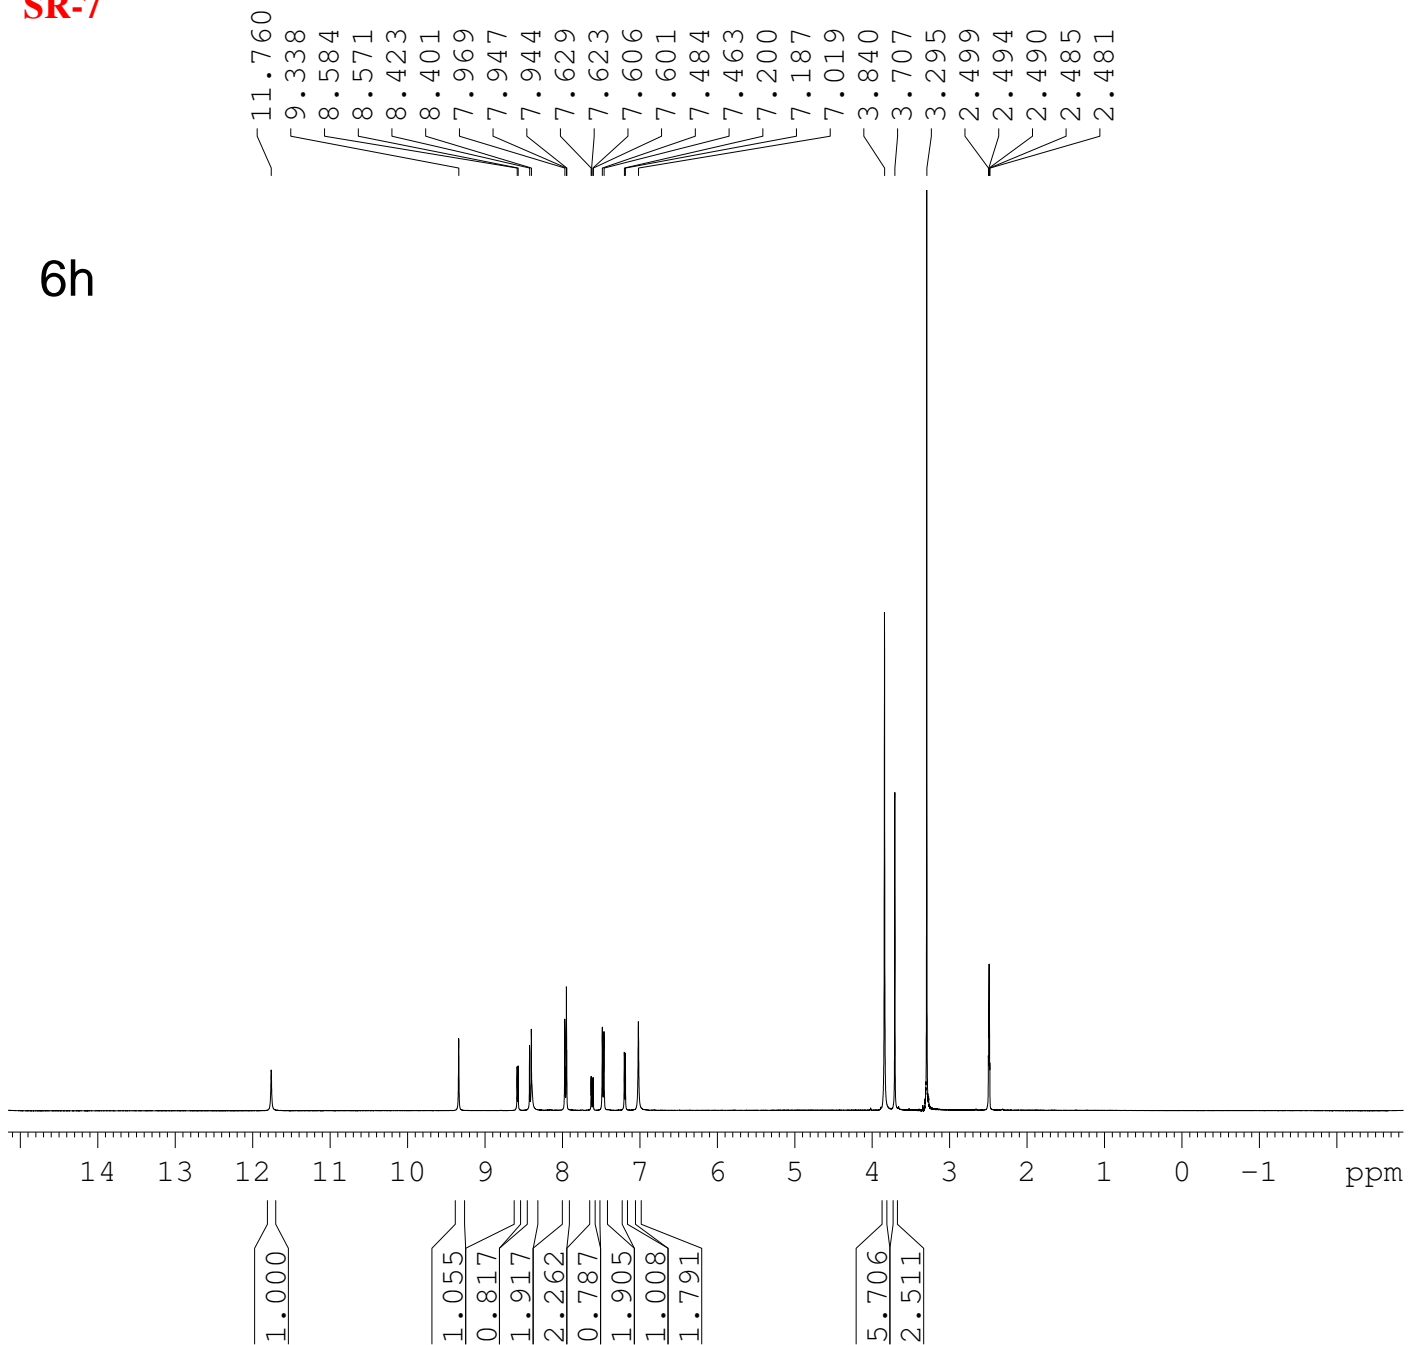

Current Data Parameters  
 NAME 20202010-klesga  
 EXPNO 4  
 PROCNO 1

F2 - Acquisition Parameters  
 Date\_ 20201020  
 Time 15.14  
 INSTRUM spect  
 PROBHD 5 mm PABBO BB-  
 PULPROG zg  
 TD 21632  
 SOLVENT DMSO  
 NS 32  
 DS 0  
 SWH 7211.539 Hz  
 FIDRES 0.333374 Hz  
 AQ 1.4998187 sec  
 RG 203  
 DW 69.333 usec  
 DE 6.50 usec  
 TE 298.0 K  
 D1 1.00000000 sec  
 TD0 1

==== CHANNEL f1 =====  
 NUC1 1H  
 P1 13.50 usec  
 PL1 -3.00 dB  
 PL1W 13.42244530 W  
 SFO1 400.2324716 MHz

F2 - Processing parameters  
 SI 32768  
 SF 400.2300103 MHz  
 WDW EM  
 SSB 0  
 LB 0.30 Hz  
 GB 0  
 PC 1.00





SR-13

6i

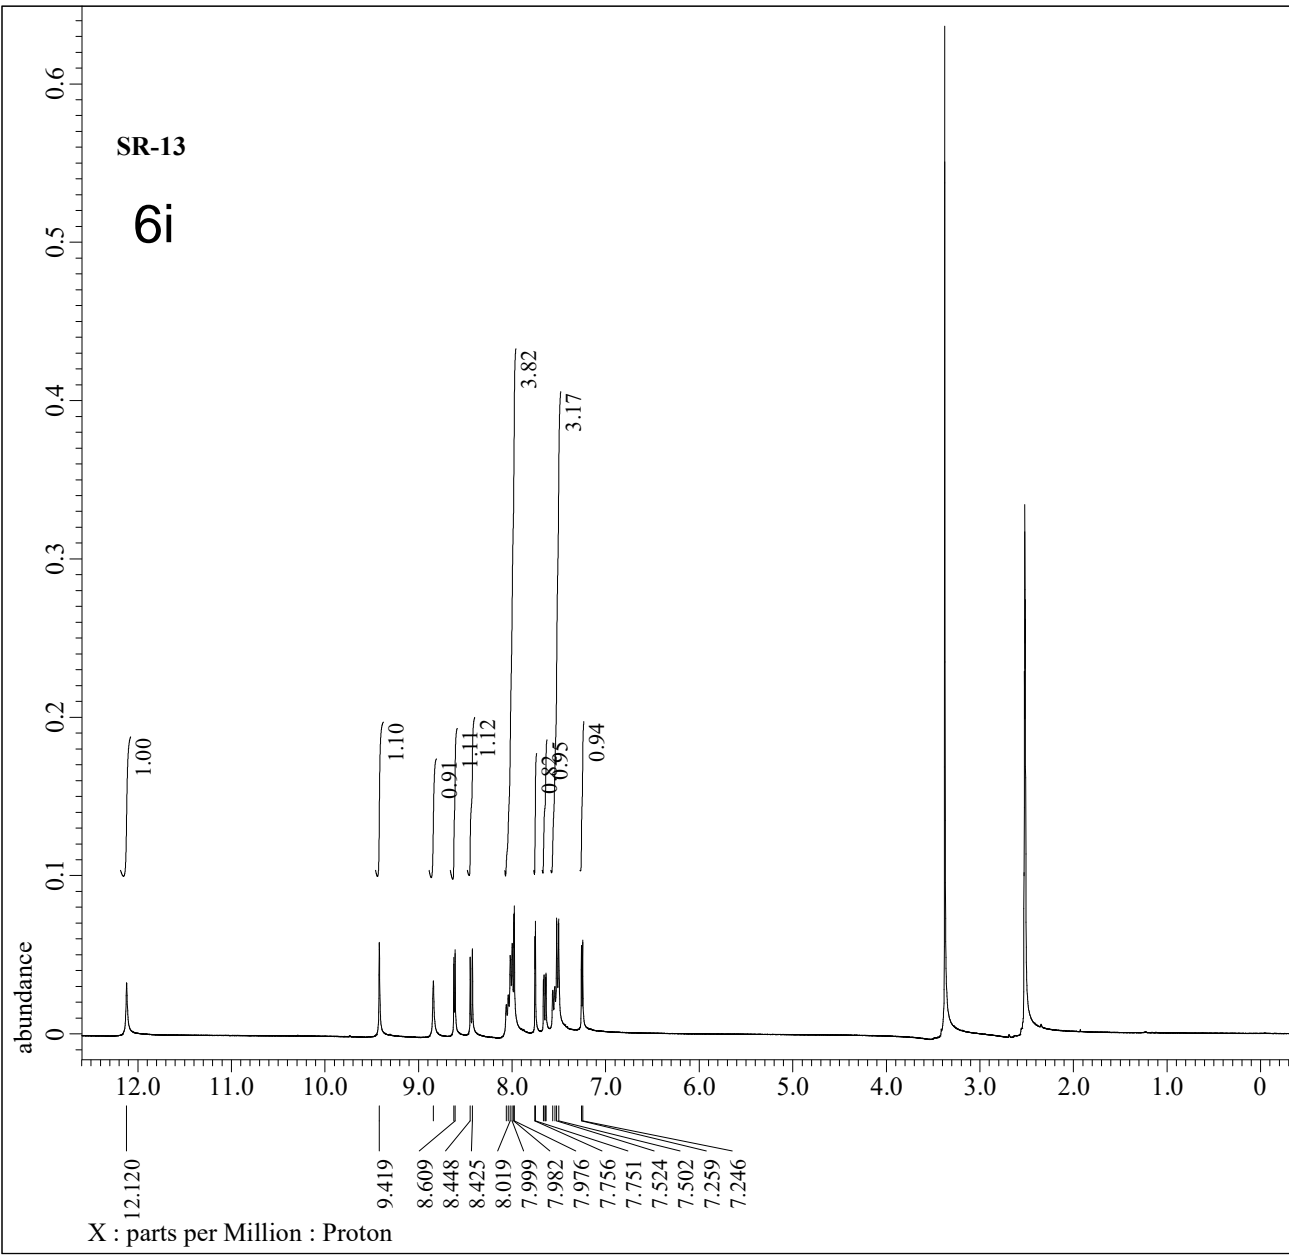

---- PROCESSING PARAMETERS ----  
sexp( 0.4[Hz], 0.0[s] )  
trapezoid( 0[%], 0[%], 80[%], 100[%] )  
zerofill( 4, TRUE )  
fft( 1, TRUE, TRUE )  
machinephase  
ppm  
phase( 5.59226, 0, 62.67643[%] )  
reference( 2.45962[ppm], 2.49[ppm] )  
Derived from: SR-13\_Proton-1-1.jdf

Filename = SR-13\_Proton-1-  
Author = SAIFKUD  
Experiment = proton.jxp  
Sample\_Id = SR-13  
Solvent = DMSO-D6  
Actual\_Start\_Time = 5-DEC-2020 09:  
Revision\_Time = 4-JUN-2021 15:

Comment = single\_pulse  
Data\_Format = 1D COMPLEX  
Dim\_Size = 52429  
X\_Domain = Proton  
Dim\_Title = Proton  
Dim\_Units = [ppm]  
Dimensions = X  
Spectrometer = DELTA2\_NMR

Field\_Strength = 9.39094035[T] (C  
X\_Acq\_Duration = 1.63577856[s]  
X\_Domain = 1H  
X\_Freq = 399.83219794[MH  
X\_Offset = 5[ppm]  
X\_Points = 16384  
X\_Prescans = 1  
X\_Resolution = 0.61132969[Hz]  
X\_Sweep = 10.01602564[kHz]  
X\_Sweep\_Clippped = 8.01282051[kHz]  
Irr\_Domain = Proton  
Irr\_Freq = 399.83219794[MH  
Irr\_Offset = 5[ppm]  
Tri\_Domain = Proton  
Tri\_Freq = 399.83219794[MH  
Tri\_Offset = 5[ppm]  
Blanking = 2[us]  
Clipped = FALSE  
Scans = 32  
Total\_Scans = 32  
Relaxation\_Delay = 5[s]  
Recvr\_Gain = 56  
Temp\_Get = 18.8[dC]  
X\_90\_Width = 10.26[us]



SR-14

6j

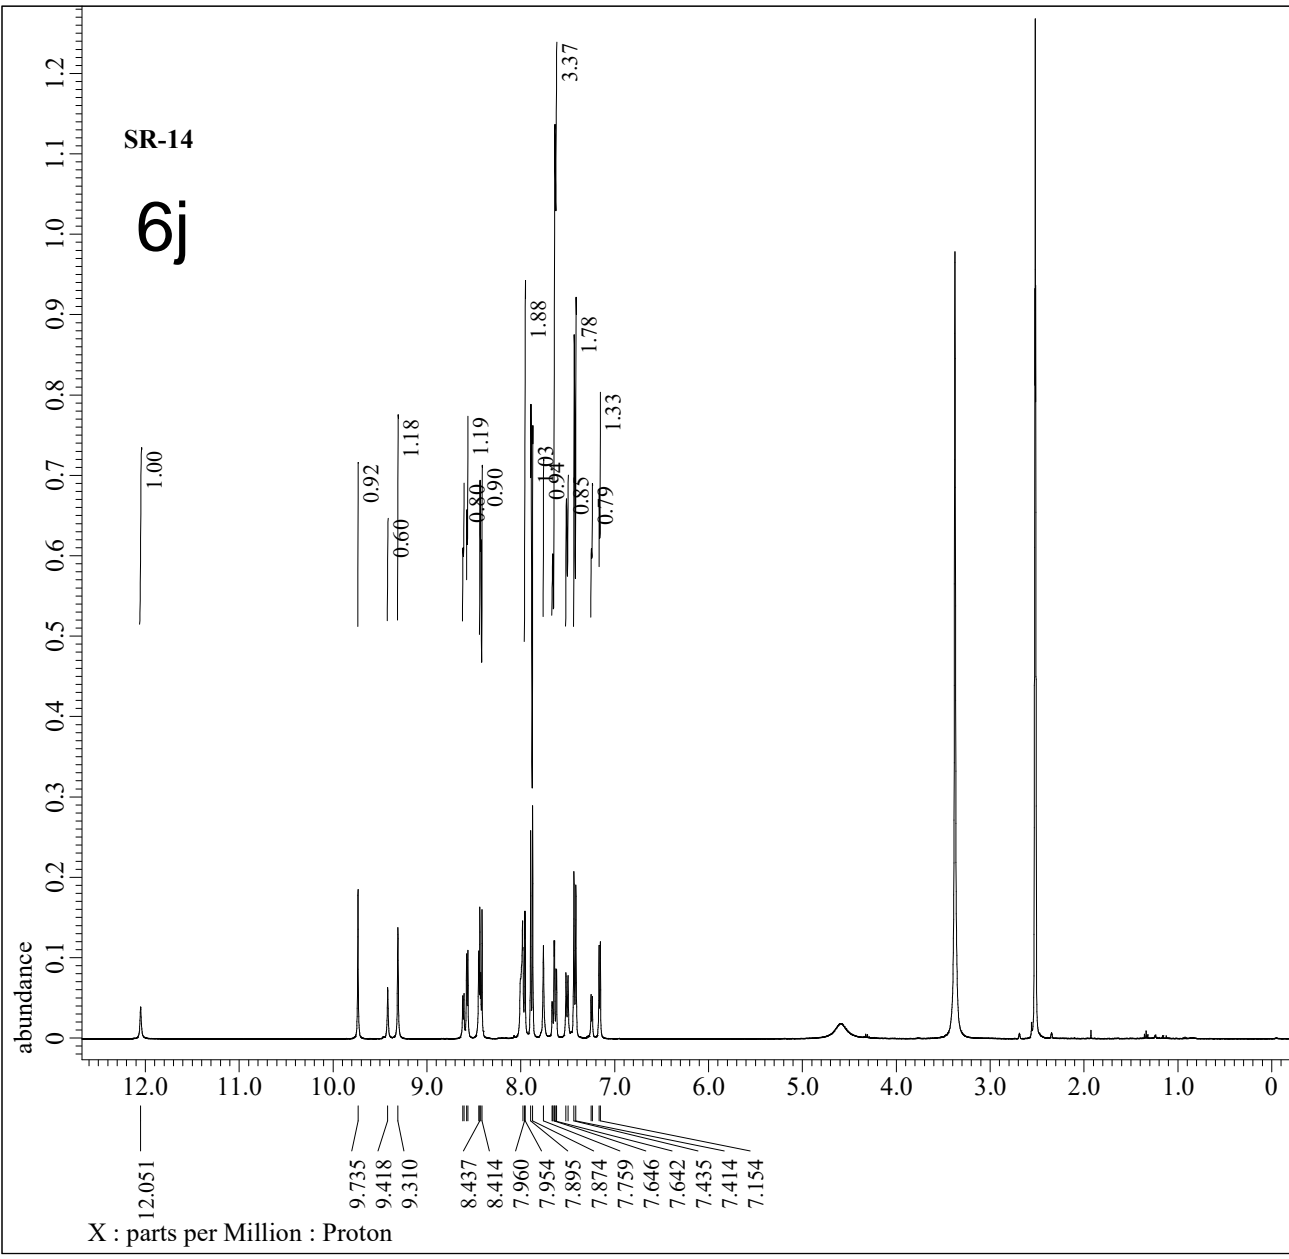

X : parts per Million : Proton

---- PROCESSING PARAMETERS ----  
sexp( 0.4[Hz], 0.0[s] )  
trapezoid( 0[%], 0[%], 80[%], 100[%] )  
zerofill( 4, TRUE )  
fft( 1, TRUE, TRUE )  
machinephase  
ppm  
phase( 0, 0, 62.67358[%] )  
reference( 2.46039[ppm], 2.49[ppm] )  
Derived from: SR\_14\_Proton-1-1.jdf

Filename = SR\_14\_Proton-1-  
Author = SAIFKUD  
Experiment = proton.jxp  
Sample Id = SR/14  
Solvent = DMSO-D6  
Actual\_Start\_Time = 15-JAN-2021 09:  
Revision\_Time = 13-JUN-2021 18:

Comment = single\_pulse  
Data\_Format = 1D COMPLEX  
Dim\_Size = 13107  
X\_Domain = Proton  
Dim\_Title = Proton  
Dim\_Units = [ppm]  
Dimensions = X  
Spectrometer = DELTA2\_NMR

Field\_Strength = 9.39094035[T]  
X\_Acq\_Duration = 1.63577856[s]  
X\_Domain = 1H  
X\_Freq = 399.83219794[MH  
X\_Offset = 5[ppm]  
X\_Points = 16384  
X\_Prescans = 1  
X\_Resolution = 0.61132969[Hz]  
X\_Sweep = 10.01602564[kHz]  
X\_Sweep\_Clipped = 8.01282051[kHz]  
Irr\_Domain = Proton  
Irr\_Freq = 399.83219794[MH  
Irr\_Offset = 5[ppm]  
Tri\_Domain = Proton  
Tri\_Freq = 399.83219794[MH  
Tri\_Offset = 5[ppm]  
Blanking = 2[us]  
Clipped = FALSE  
Scans = 32  
Total\_Scans = 32

Relaxation\_Delay = 5[s]  
Recvr\_Gain = 56  
Temp\_Get = 18[dC]  
X\_90\_Width = 10.26[us]
